# Supplementary material for: Characterization of biomass burning emissions from cooking fires, peat, crop residue, and other fuels with high-resolution proton-transfer-reaction time-of-flight mass spectrometry
Source: Copernicus journal article supplement (doi:10.5194/acp-15-845-2015), 2015-01-23
Supplement: Supplementary file 1 [file acp-15-845-2015-supplement-cover-letter.pdf › acp-15-845-2015-supplement-cover-letter.pdf]

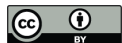

## *Supplement of*

# **Characterization of biomass burning emissions from cooking fires, peat, crop residue, and other fuels with high-resolution proton-transfer-reaction time-of-flight mass spectrometry**

**C. E. Stockwell et al.**

*Correspondence to:* R. J. Yokelson ([bob.yokelson@umontana.edu](mailto:bob.yokelson@umontana.edu))

- [acp-15-845-2015-supplement-cover-letter.pdf](#)
- [acp-2014-584-supplement.xlsx](#)
