# Supplementary material for: Characterization of biomass burning emissions from cooking fires, peat, crop residue, and other fuels with high-resolution proton-transfer-reaction time-of-flight mass spectrometry
Source: Copernicus journal article supplement (doi:10.5194/acp-15-845-2015), 2015-01-23
Supplement: Supplementary file 1 [file acp-2014-584-supplement.xlsx]

## Sheet: Table S1
Table S1. Emission ratios to CO (mol/mol)
Protonated m/z	Formula	African Grass K1 (flat)	African Grass K1 (flat)	African Grass K1 (mixed upright and flat)	African Grass K1 (upright)	African Grass K1 (upright)	African Grass K1 (upright)	African Grass K2 (upright)	African Grass K3	African Grass K3 (Add to residue of burn 53)	African grass K3 (continued from Burn 40)	African Grass K3 (upright)	African Grass S1	African Grass S1	African Grass S1	African Grass S2	African Grass S2	African Grass S3 (feeding fire)	African Grass S3 (mixed upright and flat)		African grass (18) avg	African grass (18) stdev		Alfalfa Organic CO	Alfalfa Organic CO	Alfalfa Organic CO		Alfalfa Organic CO (3) Avg	Alfalfa Organic CO (3) stdev		Black Spruce AK	Black Spruce AK	Black Spruce AK	Black Spruce AK		Black Spruce AK(4) avg	Black Spruce AK(4) stdev		Chamise CA	Chamise CA	Chamise CA	Chamise CA	Chamise CA	Chamise CA		Chamise CA (6) avg	Chamise CA (6) stdev		Cook Brats on Red Oak Coals
FTIR species	Fire #	48	49	50	46	47	52	42	53	54	41	40	82	83	91	81	92	57	58					36	65	66					39	51	74	77					1	2	20	22	63	73					110
	MCE	0.97554	0.973361	0.974749	0.978906	0.98137	0.981555	0.984013	0.983189	0.98107	0.985354	0.981105	0.977828	0.97351	0.970458	0.969917	0.971671	0.980647	0.976253		0.977805	0.00479598		0.914681	0.912323	0.927884		0.918296	0.00838674		0.959392	0.970227	0.951435	0.955903		0.959239	0.00801646		0.902725	0.910554	0.913008	0.928547	0.943288	0.954448		0.925428	0.0203066		0.865577
	CO2	39.8828	36.5386	38.6024	46.4078	52.6762	53.2147	61.5511	58.4859	51.8268	67.2765	51.924	44.101	36.7494	32.8505	32.2414	34.2997	50.6715	41.1114		46.134	10.3799		10.7207	10.4055	12.8665		11.3309	1.33917		23.6256	32.5875	19.5909	21.6771		24.3703	5.72052		9.28016	10.1799	10.4953	12.9952	16.633	20.9531		13.4228	4.54845		6.43918
	CO	1	1	1	1	1	1	1	1	1	1	1	1	1	1	1	1	1	1		1			1	1	1		1	0		1	1	1	1		1	0		1	1	1	1	1	1		1	0		1
	CH4	0.0323834	0.0400333	0.0412303	0.0259228	0.0210978	0.021998	0.0191395	0.0128634	0.00930019	0.0118039	0.0161446	0.0346524	0.0402567	0.0506889	0.0365608	0.0419729	0.0303654	0.0399879		0.0292446	0.0123346		0.166726	0.100693	0.0909236		0.119448	0.0412347		0.0711322	0.0536901	0.0855696	0.0675796		0.0694929	0.0130963		0.0801411	0.0893119	0.0662714	0.0569268	0.0417582	0.0712935		0.0676172	0.0168867		0.036829
18.0338	NH3	0.00492414	0.00473727	0.00360508	0.00490721	0.00338155	0.00275329	0.00254659	0.00276979	0.00141734	0.00183742	0.000809837	0.00863583	0.00715619	0.0146576	0.0128528	0.015694	0.00443839	0.00799866		0.00584017	0.00450393		0.194013	0.103396	0.120428		0.139279	0.0481599		0.0121539	0.0161305	0.0104097	0.00853632		0.0118076	0.00323846		0.0220782	0.0215244	0.0164157	0.0190522	0.0135937	0.0259111		0.0197626	0.0043825		-0.00149994
	C2H2	0.0032058	0.0033958	0.00340759	0.00358495	0.00280839	0.00288727	0.00278087	0.00193554	0.00151681	0.00215178	0.00274266	0.00287134	0.00301891	0.00452483	0.00228994	0.0040554	0.00297829	0.00305598		0.00295623	0.000721623		0.00537085	0.0101925	0.0106782		0.00874718	0.00293406		0.0164635	0.0112896	0.0205647	0.0175117		0.0164574	0.00385952		0.0195759	0.0200749	0.0170692	0.00922721	0.00981141	0.00885249		0.0141019	0.00536979		-0.000190804
28.0182	HCN	0.00386102	0.00450053	0.00340527									0.0050005		0.00527804	0.00549765	0.0058208	0.00584703			0.00490135	0.000904607		0.0197374	0.0116408	0.0102346		0.0138709	0.00512893		0.00571981	0.0037988	0.00534462	0.00573692		0.00515004	0.000918836		0.00597126	0.00603969	0.00472016	0.00307913	0.00220008	0.00266282		0.00411219	0.001695
	C2H4	0.0100774	0.0102858	0.0131203	0.00754692	0.00634231	0.00658827	0.00622877	0.003636	0.00301535	0.00396924	0.00467558	0.00980213	0.011586	0.0167072	0.00859276	0.0130868	0.00806211	0.0104507		0.00854298	0.00370916		0.0266191	0.0257544	0.0320476		0.0281404	0.00341127		0.0426792	0.0304532	0.053503	0.0453424		0.0429945	0.00954507		0.0409297	0.0427613	0.0321908	0.0232544	0.0144109	0.0200694		0.0289361	0.0115538		-0.000895735
31.0178	HCHO	0.0203389	0.0195059	0.0248623	0.0168454	0.012033	0.0126349	0.00882588	0.00723853	0.0060921	0.00578764	0.00799142	0.0174091	0.0237052	0.0345957	0.0185988	0.0229266	0.012357	0.0205767		0.0162403	0.00777374		0.011894	0.0105417	0.0232611		0.0152323	0.00698597		0.0290713	0.022633	0.0360846	0.0301692		0.0294895	0.00551192		0.0257322	0.0231081	0.0185482	0.0184207	0.0082094	0.0163845		0.0184005	0.006064		0.00050809
	NO	0.0488092	0.037526	0.0405237	0.0603935	0.0563482	0.0576732	0.0677777	0.0701354	0.0614493	0.0718215	0.0636628	0.068578	0.0584632	0.0506196	0.0625379	0.0640177	0.089295	0.0693582		0.061055	0.0120276		0.0265898	0.0266119	0.042084		0.0317619	0.00893921		0.0423193	0.051366	0.0279514	0.0347787		0.0391039	0.0100629		0.0108516	0.0160891	0.0156012	0.0222677	0.0386085	0.039727		0.0238575	0.0124067		-0.00447702
33.0335	CH3OH	0.00673098	0.00828675	0.00936579	0.00328304	0.00254881	0.000904835	0.00201267	0.00181436	0.00121984	0.00122895	0.00193568	0.00575922	0.0113218	0.0124946	0.00914002	0.00788517	0.00289961	0.0079348		0.00537594	0.0038211		0.0756493	0.0175349	0.0246597		0.0392813	0.0316964		0.0152116	0.0239151	0.0227287	0.010382		0.0180594	0.00640687		0.0108867	0.0133412	0.00712492	0.0109967	0.00438218	0.0152726		0.010334	0.0039975		0.0039211
	HCl	0.00780238	0.00752966	0.00779359	0.0115568	0.00881367	0.0089971	0.00813802	0.0150123	0.0123829	0.0192324	0.00980187	0.00654974	0.0065591	0.00483313	0.00883495	0.00740522	0.00719602	0.00831681		0.0092642	0.00342708		0.0006932	0.000406468			0.000549834	0.00020275		0.000316512	0.000654025	0.00101801	0.00132387		0.000828104	0.00043737			0.000216067						0.000216067
43.0542	C3H6	0.00148412	0.00155578	0.00225684											0.00277595	0.00182855	0.00239612				0.00204956	0.000510509		0.014096	0.00803984	0.0103627		0.0108328	0.00305533		0.00783594	0.00547572	0.0100077	0.00701361		0.00758324	0.00188927		0.00591253	0.00612261	0.00376195	0.00384882	0.00174908	0.00525223		0.0044412	0.00165587		-0.000740423
47.0128	HCOOH	0.00158988	0.0023635	0.00216217	0.00204222	0.0016971	0.00179824	0.0011612	0.000752584	0.000843856	0.000994195	0.00184031	0.00115335	0.00238743	0.00399771	0.0013737	0.00166027	0.000283973	0.00158045		0.00164901	0.000817564		0.00199824	0.000169552			0.0010839	0.00129308		0.00355291	0.00265076	0.00619903	0.00405718		0.00411497	0.00150626		0.00133717	0.00154281	0.000953983	0.00159644	0.000394462	0.00127538		0.00118337	0.000448762		0.000173584
	NO2	0.0298475	0.025949	0.0235632	0.0341376	0.0313118	0.0328301	0.0321924	0.0260396	0.0256809	0.0284216	0.0343836	0.02454	0.023487	0.0219334	0.0248584	0.0218905	0.0195993	0.0260178		0.027038	0.00447988		0.00902016	0.00766106	0.0154099		0.010697	0.00413764		0.0335219	0.032065	0.0269744	0.0317147		0.031069	0.00283968		0.0039519	0.00472866	0.00634484	0.0126253	0.00682966	0.00578265		0.0067105	0.00308322
	HONO	0.00411325	0.003561	0.00473511		0.00430217	0.00486556	0.00408714	0.00504853	0.00505625	0.00591499	0.00434467	0.00387484	0.00434204	0.00461795	0.00392312	0.00384651	0.00657242	0.00486213		0.00459222	0.000772069		0.00504926	0.0017913			0.00342028	0.00230373		0.00612102	0.00874872	0.00632103	0.00634909		0.00688496	0.00124665		0.00478809	0.00532922	0.00434961	0.0063741	0.00299121	0.00520963		0.00484031	0.00113054		0.000912791
61.0284	CH3COOH	0.0135808	0.014774	0.0174985	0.00555201				0.00587023		0.0061771	0.00526623	0.0116564	0.0257672	0.0253171	0.0169722	0.0124302	0.00750539	0.0158813		0.0131606	0.00683398		0.0803074	0.0117522	0.00742954		0.033163	0.0408854		0.0148254	0.00924515	0.0245422	0.013719		0.0155829	0.00644164		0.00964817	0.0119107	0.00647313	0.0114707	0.00344454	0.012624		0.00926187	0.00360463		0.00362925
	C2H4O2														0.00497168	0.000624539					0.00279811	0.00307389		0.000373153				0.000373153			0.00315373	0.00165345	0.00556231	0.00409556		0.00361626	0.00164148		0.00076086	0.000442641						0.000601751	0.000225015		0.000477626
	SO2	0.0089959	0.0100563	0.0125189	0.025454	0.0163452	0.0173859	0.0204114	0.0235843	0.0248601	0.0230572	0.0262743	0.0182073	0.0191771	0.0132819	0.0207726	0.0232667		0.016534		0.0188343	0.00536439		0.00901188	0.00383194			0.00642191	0.00366277		0.00883278	0.0116625				0.0102476	0.00200091			0.00176829	0.00136621		0.00422305	0.00709301		0.00361264	0.00264157
69.0335	C4H4O	0.00129803	0.00128504	0.00149313	8.73713e-05	0.000990391	0.00119234	0.000364723	0.000244607	0.000154363	0.000180729	0.000360054	0.00119113	0.00282403	0.00167379	0.00144097	0.00146242	0.00220422	0.00157538		0.00111237	0.000760536		0.00184502	0.00080394	0.000833339		0.00116077	0.000592763		0.000791291	0.00119283	0.00139082	0.000936572		0.00107788	0.000266612		0.00137652	0.00105608	0.000434249	0.000541061	0.000447396	0.00140142		0.000876121	0.000458267		0.000284242
PTR-TOF-MS
41.0386	C3H4																																						0.00265151	0.00213617	0.00234757	0.00247252				0.00240194	0.000216684
42.0338	C2H3N	0.000884023	0.00065428	0.00053005	3.12617e-05	0.000215003	0.000116865	0.000186162	0.000157214	8.33708e-05	0.000125369	0.000170556	0.000624267	0.00085392	0.00103741	0.00114002	0.00113932	0.000365053	0.000785116		0.000505514	0.000391467		0.00492698	0.00645747	0.00665774		0.00601406	0.000946752		0.000885045	0.000611814	0.000868442	0.000563069		0.000732093	0.000168346				0.000897966	0.000742646	0.000540686	0.000981145		0.000790611	0.000193728		9.40169e-05
43.0178	C2H2O	0.00874945	0.00697934	0.0120037	0.000447794	0.00252911	0.001372	0.00205335	0.00139721	0.000980922	0.00105417	0.00218131	0.00580324	0.015249	0.0195702	0.0077333	0.00787993	0.00534825	0.00896689		0.00612773	0.00539639		0.0169115	0.0066025	0.00543152		0.00964851	0.00631713		0.00931018	0.00669922	0.0159721	0.00740184		0.00984583	0.00423054		0.00684477	0.00963238	0.00432419	0.00689418	0.00227381	0.00585945		0.00597146	0.00250659		0.00170062
45.0335	C2H4O	0.0119582	0.00874149	0.0161078	0.000544358	0.00348871	0.00179054	0.00315875	0.0018573	0.00113195	0.00140596	0.00243225	0.00791261	0.0150882	0.0217741	0.0098027	0.0125235	0.00504839	0.010161		0.00749599	0.00619187		0.0411225	0.0138843	0.0228245		0.0259438	0.0138844		0.0118459	0.0137154	0.018266	0.00878189		0.0131523	0.00396964		0.00960859	0.0103673	0.00624862	0.00743095	0.00478161	0.00692487		0.00756032	0.00209461		0.0016996
51.0229	C4H2	-1.13522e-05	1.85375e-05	1.2158e-05	3.38275e-06	-7.33018e-06	-2.12294e-06	3.45635e-06	3.63919e-06	1.13569e-06	2.09022e-06	-2.10599e-06	8.17994e-06	1.02108e-05	9.60935e-06	7.06574e-06	4.75686e-06	3.63115e-06	3.11817e-06		3.78113e-06	6.97441e-06		1.74102e-05	2.67253e-05	3.59152e-05		2.66836e-05	9.25257e-06		5.03628e-05	2.26815e-05	6.39338e-05	2.46757e-05		4.04134e-05	2.01188e-05		1.66707e-05	2.17396e-05	4.47591e-05	1.62468e-05	2.26393e-05	2.05058e-05		2.37602e-05	1.06169e-05		1.73771e-06
53.0386	C4H4	0.000196881	0.000174082	0.000228128	1.08799e-05	4.72616e-05	2.89607e-05	5.84209e-05	3.06149e-05	2.03548e-05	2.70503e-05	4.2961e-05	0.000150233	0.000334411	0.000412275	0.000168695	0.000198959	0.000113509	0.000180483		0.000134676	0.000114542		0.000288641	0.000270379	0.00028963		0.000282883	1.08404e-05		0.000462895	0.000258829	0.000703379	0.000396823		0.000455481	0.00018585		0.000371174	0.000245106	0.000311617	0.000243673	0.000189719	0.000255119		0.000269401	6.3159e-05		4.0313e-05
55.0178	C3H2O	0.000318055	0.000249523	0.000324766	1.7458e-05	0.000101586	5.6373e-05	9.10568e-05	6.15513e-05	4.15591e-05	5.09511e-05	0.000101413	0.000197054	0.000445015	0.000508199	0.00024682	0.000255645				0.000191689	0.00015119		0.00017408	0.000115921	0.00019086		0.000160287	3.93275e-05		0.000365934	0.000247627	0.000575189	0.000310074		0.000374706	0.000142123		0.000199096	0.000112164	9.84275e-05	0.000156211	6.65718e-05	0.000184452		0.000136154	5.2033e-05
55.0542	C4H6	0.000362685	0.000466416	0.000747545	1.42761e-05	0.00019288	0.000121467	0.000198506	0.000104634	6.90386e-05	6.68479e-05	0.000151803	0.00043868	0.000826195	0.000996059	0.000547419	0.000627627	0.000325365	0.00055159		0.00037828	0.000290825		0.00112925	0.0013738	0.00159747		0.00136684	0.000234188		0.00195526	0.00128156	0.0030285	0.0014717		0.00193425	0.000782684		0.00144542	0.00102587	0.00121221	0.00123536	0.000558194	0.00116126		0.00110639	0.000300927		0.000598982
57.0335	C3H4O	0.00362549	0.00248433	0.00380825	0.000193802	0.00111425	0.000631553	0.001018	0.000623649	0.000396008	0.000473167	0.000798275	0.00251894	0.0047526	0.00646601	0.00273303	0.0036631	0.00158306	0.00296686		0.00221391	0.00175989		0.0027708	0.00236917	0.00345178		0.00286392	0.000547279		0.00433195	0.00282736	0.00627069	0.00329707		0.00418177	0.00152788		0.00382966	0.00233486	0.00258696	0.00293289	0.00118544	0.00281226		0.00261368	0.000864669		0.00067144
57.0699	C4H8	-0.000208621	0.000630118	0.000618805	-3.59025e-05	0.000218375	7.67468e-05	0.000172617	5.34725e-05	-3.59537e-05	3.08648e-05	-6.56053e-05	0.000264152	0.00037856	0.000719757	0.000392849	0.000433654	-0.000361881	0.000387797		0.000203878	0.000299434		0.00161874	0.00145792	0.00143595		0.0015042	9.97981e-05		0.00139774	0.00105772	0.00213922	0.000642889		0.00130939	0.000633505		0.000439056	0.00155957	0.000628464	0.00114258	0.000459834	0.00113788		0.000894564	0.000453924		0.00105108
59.0491	C3H6O	0.00214057	0.00188261	0.00278587	7.64991e-05	0.000591282	-0.000967183	0.000566868	0.000348134	0.000248903	0.000773173	-0.00146512	0.00163651	0.00320234	0.0037389	0.00214165	0.00232771	-0.000170012	0.00153928		0.00118878	0.00142055		0.00582835	0.00475552	0.0050836		0.00522249	0.000549735		0.00288076	0.026292	0.0044031	0.00202725		0.00890078	0.0116357		0.00232914	0.0014846			0.00073655	0.00238804		0.00173458	0.000782957		0.000565567
63.0263	C2H6S	8.59013e-05	7.35731e-05	8.30625e-05	6.61187e-06	2.74738e-05															5.53245e-05	3.60067e-05																	9.35087e-05	5.61115e-05			3.93607e-05			6.29936e-05	2.77223e-05
67.0542	C5H6	0.000151304	0.000130189	0.000207499	9.27265e-06	5.5304e-05	3.78863e-05	6.72708e-05	3.42197e-05	1.83971e-05	2.79389e-05	4.7075e-05	0.000145489	0.000274666	0.000293406	0.000166013	0.000197638	0.000123831	0.00017483		0.000120124	8.81143e-05		0.000432325	0.000500783	0.000528689		0.000487266	4.95837e-05		0.000997287	0.00056783	0.00143234	0.000781385		0.000944711	0.000369351		0.000613422	0.000415775	0.000465375	0.00036141		0.000373339		0.000445864	0.000102169		0.0001079
68.9971	C3O2							1.15389e-05			7.03315e-06							9.75717e-06	3.68409e-06		8.00333e-06	3.4241e-06			6.10215e-06	5.90537e-06		6.00376e-06	1.39144e-07
69.0699	C5H8	-6.09314e-05	0.000516547	0.000642673	-2.64526e-05	0.000252132	0.000148833	0.000195639	0.000102437	5.76111e-05	-2.6598e-07	0.000145709	0.000346966	0.000611293	0.000842122	0.000507573	0.000518008	0.000525143	0.000526673		0.000325095	0.000268251		0.00235205	0.00220624	0.00240668		0.00232166	0.000103619		0.00385119	0.00251084	0.00590932	0.0027023		0.00374341	0.00156055		0.00281976	0.00234491	0.00216642	0.00249641	0.0008222	0.00262252		0.00221204	0.000716948		0.000960117
71.0491	C4H6O	0.00172551	0.00126417	0.00212593	7.88459e-05	0.000437562	0.000231647	0.000409002	0.000235598	0.000135308	0.000175629	0.000279594	0.0013049	0.00270944	0.00311482	0.00153516	0.00175651	0.000764836	0.00167049		0.00110861	0.000943641		0.00170841	0.0012822	0.00173822		0.00157628	0.000255114		0.00193703	0.00127408	0.00290932	0.0014762		0.00189916	0.000728349		0.00156552	0.000906531	0.00102028	0.0011492	0.000422724	0.00129098		0.00105921	0.000386809		0.000252216
73.0284	C3H4O2	0.00199648	0.00147316	0.00227257	0.000116582	0.000629793	0.00034662	0.000516865	0.000342903	0.000242965	0.000246913	0.000562995	0.00128151	0.00295322	0.00371051	0.00168964	0.00181282	0.00115124	0.00185523		0.001289	0.00102342		0.000700915	0.000453132	0.000618661		0.000590903	0.000126202		0.00164353	0.00109438	0.0029946	0.00137599		0.00177712	0.00084205		0.000942613	0.000568683	0.000584385	0.000790477	0.000239035	0.00068581		0.000635167	0.000238801		0.000219142
73.0648	C4H8O	0.000386632	0.000377843	0.000535346	8.90874e-06	0.000102401	4.99154e-05	8.79873e-05	3.33998e-05	2.8378e-05	3.49727e-05	8.24064e-05	0.000291852	0.0006025	0.000654989	0.000429794	0.000400067	0.000219955	0.000412908		0.000263348	0.000217213		0.00177817	0.00127624	0.00131982		0.00145808	0.000278064		0.000497073	0.000324168	0.000882177	0.000318785		0.000505551	0.000264386		0.000421343	0.000285454	0.000272247	0.000333162	0.000146177	0.000529787		0.000331362	0.000132188		0.000125034
75.0441	C3H6O2	0.00206125	0.00170003	0.00282259	6.86076e-05	0.000485397	0.000257102	0.000399136	0.000222741	0.000126934	0.000155031	0.000300208			0.00450942		0.00211573	0.00109499	0.00221913		0.00123589	0.00130315		0.00748334	0.00314822	0.00225083		0.00429413	0.00279815		0.00210247	0.00123326	0.00399064	0.00167954		0.00225148	0.00121254				0.000797515	0.00123346	0.000517567	0.00143091		0.000994863	0.000413853		0.000506324
79.0542	C6H6	0.000912999	0.000686725	0.000789759	5.1536e-05	0.000367858	0.00024126	0.000447738	0.000278632	0.000205247	0.000304056	0.000370963	0.00065924	0.000954587	0.0010545	0.000682936	0.000980193	0.000471311	0.000719118		0.000565481	0.000301347		0.00117816	0.00335362	0.00286709		0.00246629	0.00114177		0.00472599	0.003177	0.00601119	0.00390123		0.00445385	0.00121588		0.00478089	0.00323917	0.00408684	0.00236377	0.002533	0.00256587		0.00326159	0.000980894		0.000912656
81.0335	C5H4O	0.000519965	0.000383148	0.000584596	2.67623e-05	0.000128751	7.46113e-05	0.000106282	7.19156e-05	4.44586e-05	5.48109e-05	0.000103825	0.000354658	0.000862227	0.00102873	0.000504231	0.000515251	0.00023427	0.000450295		0.000336044	0.000295678		0.000721872	0.000480336	0.00057962		0.000593943	0.000121403		0.000656007	0.000440757	0.000936932	0.000436519		0.000617554	0.000236299		0.000474774	0.000271424	0.000349252	0.000451989		0.00050744		0.000410976	9.79058e-05		0.000122061
83.0491	C5H6O	0.00108651	0.000844947	0.00133784	4.41289e-05	0.000223028	0.000122183	0.000204526	0.000122013	6.77617e-05	8.6013e-05	0.00014881	0.000776636	0.00173644	0.00178971	0.0010797	0.000985928	0.000538937	0.00110229		0.000683189	0.000589368		0.00167575	0.00114238	0.00107947		0.0012992	0.000327615		0.00103289	0.00067311	0.00175325	0.000750212		0.00105237	0.000492189		0.000693686	0.000452404	0.000464353	0.000610067	0.000190514	0.000838714		0.000541623	0.000225068		0.00020301
83.0855	C6H10	-3.07605e-05	8.4258e-05	9.24737e-05	-9.41587e-06	3.24277e-05	1.8883e-05	1.38688e-05	8.84073e-06	6.15895e-06	-9.5808e-06	2.11146e-06	5.00234e-05	9.63869e-05	0.000117176	7.16476e-05	6.61287e-05	5.11958e-05	6.85806e-05		4.0578e-05	4.28498e-05		0.000303443	0.000233697	0.000296744		0.000277961	3.84801e-05		0.000306035	0.000236041	0.000500383	0.00016098		0.00030086	0.000145607		3.68368e-05	0.000114899	0.000108595	0.000194414		0.000198246		0.000130598	6.7399e-05		0.000159115
85.0284	C4H4O2	0.00207735	0.00160279	0.00244441	0.000106415	0.000527406	0.000283109	0.000409208	0.000268599	0.000158954	0.000184669	0.000389864	0.00140772	0.00344514	0.00405311	0.00186498	0.00182361	0.000992035	0.00197521		0.00133414	0.00117845		0.00119094	0.000592624	0.000541994		0.000775186	0.000360942		0.00137348	0.00103624	0.00246102	0.00101201		0.00147069	0.000680524		0.000892064	0.00059248	0.000534893	0.00092476		0.000774352		0.00074371	0.000174787		0.000225267
85.0648	C5H8O	0.00037847	0.000304086	0.000534581	9.9541e-06	8.7204e-05	4.63711e-05	7.86582e-05	4.61274e-05	2.45833e-05	3.23532e-05	5.63774e-05	0.000280795	0.000602992	0.000642886	0.000384245	0.000351262	0.00020773	0.000406593		0.000248626	0.000212418		0.000806867	0.000575466	0.000571121		0.000651151	0.000134871		0.000551356	0.000366217	0.00085298	0.000403651		0.000543551	0.000221229		0.000354972	0.000238222	0.000224699	0.000264148		0.000376955		0.000291799	6.96058e-05		8.03e-05
87.0441	C4H6O2	0.00150816	0.00117387	0.00193654	7.67408e-05	0.000379993	0.000217147	0.000330945	0.000210488	0.000133483	0.000150607	0.000310131	0.00107371	0.00263144	0.0029671	0.0014937	0.00143731	0.000761601	0.0014699		0.0010146	0.000883833		0.00286128	0.00151147	0.00150589		0.00195955	0.000780929		0.00130086	0.000808234	0.00219677	0.000962667		0.00131713	0.000621463		0.00101539	0.000689759	0.000603637	0.00094167		0.000943023		0.000838696	0.000180377		0.000292718
89.0597	C4H8O2	0.000223556	0.00019579	0.00029354	8.93364e-06	4.84753e-05	2.64699e-05	3.87451e-05	2.36054e-05	1.17874e-05	1.40351e-05	2.79469e-05	0.000173781	0.000436832	0.000461227	0.000274622	0.000219728	0.000116172	0.000237046		0.00015735	0.000145977		0.000640695	0.000354436	0.000205564		0.000400232	0.000221151		0.000183822	0.000106974	0.000358703	0.000120072		0.000192393	0.000115844		0.000149289	0.000104053	0.000106004	0.000158353		0.000195599		0.00014266	3.84932e-05		5.52699e-05
91.0542	C7H6							7.66824e-06			3.75175e-06	2.7473e-05	3.11243e-05	6.00996e-05	8.81111e-05	4.98863e-05	4.67183e-05	3.49328e-05	4.14036e-05		3.91169e-05	2.46675e-05		0.000209661	0.00015798	0.000154916		0.000174186	3.07607e-05		0.000200023		0.000325925	0.000160565		0.000228838	8.63637e-05		0.00013892	7.98157e-05	0.000106492	0.000100055		0.000117555		0.000108568	2.18259e-05		4.07326e-05
93.0699	C7H8	0.000313618	0.000358595	0.000527447	1.16992e-05	0.00013694	0.000314613	0.000195736	0.000127806	5.86242e-05	4.8551e-05	0.000141831	0.000357476	0.000658328	0.000683916	0.000474715	0.000435934	0.000189778	0.000448902		0.000304695	0.000204985		0.00168703	0.0019367	0.00180406		0.00180926	0.000124916		0.0171696	0.00855266	0.0211255	0.0122493		0.0147743	0.0055124		0.00192391	0.00134016	0.00124663	0.00132537	0.000590066	0.00158821		0.00133572	0.000441312		0.000525933
95.0491	C6H6O	0.000706987	0.000524041	0.000767339	3.69434e-05	0.000187138	9.80879e-05	0.000187605	0.00011142	5.95945e-05	9.97435e-05	0.000131661	0.00053429	0.00103814	0.00103374	0.000540563	0.000671879	0.000362391	0.000618724		0.000428349	0.000332071		0.00174987	0.00146319	0.00129074		0.00150127	0.000231921		0.00126848	0.000824319	0.00186492	0.00086154		0.00120481	0.000483876		0.0014779	0.000855579	0.00100192	0.000870715		0.000851471		0.00101152	0.000268031		0.000115616
97.0284	C5H4O2	0.00440801	0.003188	0.00444033	0.000170509	0.000884255	0.000484796	0.000673504	0.000506014	0.000294963	0.000357251	0.000657809	0.00210154	0.00558301	0.0061059	0.00308516	0.00292625	0.00155805	0.00306989		0.00224974	0.00193134		0.00114498	0.000659719	0.000935843		0.000913514	0.0002434		0.00173632	0.00120978	0.00309267	0.00133142		0.00184255	0.000863276		0.0010818	0.000689757	0.000701388	0.00107443		0.00124994		0.000959463	0.000250951		0.00034356
99.0441	C5H6O2	0.0016102	0.00128367	0.00217428	6.5646e-05	0.000331573	0.000175644	0.000270438	0.00015548	8.56999e-05	0.00011434	0.00023212	0.00128002	0.00325136	0.00347485	0.00168922	0.00147384	0.000804208	0.0017098		0.00112124	0.00107199		0.00140738	0.000687483	0.000470053		0.000854972	0.000490596		0.0011215	0.000715836	0.00210915	0.000835172		0.00119541	0.000632494		0.000844098	0.000569926	0.000482002	0.000750191		0.00068943		0.000667129	0.000143558		0.000217926
101.06	C5H8O2	0.000363274	0.000305115	0.000483339	1.2768e-05	8.09292e-05	4.1884e-05	6.27313e-05	4.3555e-05	1.89215e-05	2.78514e-05	5.09975e-05	0.000288407	0.000731436	0.000743731	0.000414046	0.000343266	0.000199318	0.000402854		0.000256357	0.000237186		0.000559715	0.00030983	0.000229427		0.000366324	0.000172239		0.000346202	0.000215346	0.000645832	0.000265884		0.000368316	0.000192697		0.000237083	0.000171239	0.000176304	0.000255431		0.000253531		0.000218718	4.16841e-05		0.000100561
103.054	C8H6																																								0.00016146	0.000223673				0.000192566	4.39912e-05
105.07	C8H8	7.38491e-05	5.81651e-05	7.36966e-05	3.6173e-06	2.62806e-05	1.68468e-05	2.86617e-05	1.57705e-05	8.17425e-06	1.63179e-05	1.88829e-05	5.79347e-05	8.48889e-05	9.74702e-05	6.5977e-05	8.52611e-05	2.97103e-05	6.78967e-05		4.60779e-05	3.06561e-05		0.000302837	0.000404037	0.000395258		0.000367377	5.60657e-05		0.000434061	0.000278992	0.000587083	0.000335048		0.000408796	0.000135046		0.0003991	0.000233424	0.000303631	0.000205962		0.000200844		0.000268592	8.36797e-05		5.98412e-05
107.049	C7H6O	0.000135077	9.48485e-05	0.000110401	7.76619e-06	4.69649e-05	2.60418e-05	3.85197e-05	2.61016e-05	1.68064e-05	2.29325e-05	3.22165e-05	8.10563e-05	0.000140026	0.00015998	0.000101979	0.000130327	6.0927e-05	9.30324e-05		7.36113e-05	4.87331e-05		0.000198024	0.00025587	0.000453719		0.000302538	0.000134084		0.000391596	0.000279057	0.000489961	0.000297449		0.000364516	9.70756e-05		0.000388138	0.000186071	0.000271344	0.000224508		0.0002428		0.000262572	7.67072e-05		2.34588e-05
107.086	C8H10	0.000104686	8.41704e-05	0.000129403	4.98884e-06	3.43055e-05	3.23517e-05	4.0868e-05	2.42077e-05	9.49454e-06	1.96322e-05	3.17763e-05	8.77453e-05	0.000138465	0.000148547	0.000109374	0.000110654	7.70452e-05	0.000116967		7.24823e-05	4.78814e-05		0.0004761	0.00054713	0.000483196		0.000502142	3.9122e-05		0.00113524	0.000674575	0.00144347	0.000862579		0.00102897	0.000334856		0.000499517	0.000303658	0.000328431	0.00030658	0.000186393	0.000456735		0.000346886	0.000113978		0.00014309
109.028	C6H4O2							5.03683e-05			2.63529e-05										3.83606e-05	1.69815e-05																	0.00150203	0.000501766	0.000973966	0.00114375				0.00103038	0.0004155
111.044	C6H6O2	0.000896558	0.000705002	0.00109778	3.40164e-05	0.000170498	8.9131e-05	0.000139855	8.43457e-05	3.9999e-05	5.57186e-05	9.19062e-05	0.000585717	0.00145528	0.00153626	0.000842384	0.000750927	0.000413549	0.000908137		0.000549837	0.000498965		0.00102734	0.000458359	0.000350291		0.000611997	0.000363734		0.000767028	0.000548759	0.00146414	0.000569943		0.000837468	0.000429186		0.00120016	0.00138713	0.000288997	0.00151301		0.000655588		0.00100898	0.000518858		0.000124247
111.08	C7H10O	0.000194467	0.000157095	0.000265226	6.25423e-06	3.91361e-05	2.12793e-05		2.01595e-05	1.00546e-05		2.4366e-05	0.000145291	0.000302554	0.000284832	0.000195488	0.000164985	8.82845e-05	0.000201451		0.000132558	0.000104055		0.000904795	0.00056928	0.000421696		0.000631924	0.000247567		0.000287984	0.000176834	0.000440379	0.000191573		0.000274192	0.000121261		7.8409e-05	8.42395e-05	5.53479e-05	8.85688e-05		0.000206556		0.000102624	5.94954e-05		3.57781e-05
113.023	C5H4O3	0.000403726	0.00034817	0.00042416	2.22858e-05	0.000106139	5.95042e-05	7.82572e-05	5.64052e-05	3.25686e-05	4.71375e-05	9.32466e-05	0.000230241	0.000627221	0.000731302	0.000392242	0.000330269	0.000203018	0.000357574		0.000252415	0.000212423		0.000157659	7.55454e-05	6.7647e-05		0.000100284	4.98451e-05		0.000345204	0.000234715	0.000655947	0.000249504		0.000371342	0.000195955		0.000202162	0.000120948	0.000107981	0.000194739		0.00014153		0.000153472	4.28472e-05		2.60318e-05
113.06	C6H8O2	0.000507248	0.000418377	0.00068814	1.69158e-05	9.64942e-05	5.42713e-05	7.621e-05	4.65949e-05	2.07984e-05	2.74209e-05	5.9775e-05			0.00102936		0.000468804	0.000217007	0.000526455		0.000283591	0.000308035		0.00134176	0.000623543	0.000348543		0.000771282	0.000512826		0.000456984	0.000275443	0.000902415	0.000346363		0.000495301	0.000281502		0.00029634	0.000217614	0.000178938	0.000309324		0.00032565		0.000265573	6.37881e-05		8.80633e-05
115.039	C5H6O3						0.000181469	0.000262379	0.000148233	0.00011208	0.000147483	0.000370538			0.0027604		0.000926006	0.000591016	0.00094934		0.000644894	0.000807211		0.000242984	9.22199e-05	6.5687e-05		0.00013363	9.56278e-05		0.000485897	0.000325972	0.00095992	0.000356319		0.000532027	0.000293571		0.000327722	0.000236906	0.000186269	0.000372407		0.000281963		0.000281053	7.32416e-05		8.15946e-05
117.07	C9H8																	0.000153453	0.000360218		0.000256836	0.000146205			0.000157929	0.000108964		0.000133447	3.46235e-05
119.049	C8H6O	6.58703e-05	4.59347e-05	6.41148e-05	3.79871e-06	2.06805e-05	1.10161e-05	1.98283e-05	1.22005e-05	7.53015e-06	1.16191e-05	1.29285e-05	4.44365e-05	8.14872e-05	9.2994e-05	5.23381e-05	6.21986e-05	2.81521e-05	4.98388e-05		3.81648e-05	2.76033e-05		0.000116264	0.000132665	0.000136485		0.000128471	1.0743e-05		0.000121386	9.73094e-05	0.000183537	9.20389e-05		0.000123568	4.19708e-05		0.00012768	7.68016e-05	7.56286e-05	7.72515e-05		8.00083e-05		8.7474e-05	2.25332e-05		1.58059e-05
119.086	C9H10	3.57823e-05	2.61371e-05	3.49861e-05	1.03793e-06	9.68484e-06	8.71631e-06	1.15177e-05	6.34761e-06	2.80965e-06	4.35089e-06	4.66848e-06	2.44738e-05	4.13158e-05	4.25536e-05	2.80327e-05	2.91208e-05	3.27884e-05	2.93541e-05		2.07599e-05	1.43687e-05		0.000118192	0.000140912	0.000149589		0.000136231	1.62135e-05		0.000245175	0.000154794	0.000353237	0.00019413		0.000236834	8.59717e-05		0.000158993	9.2507e-05	0.000111535	8.99253e-05		0.000109354		0.000112463	2.77568e-05		3.21731e-05
121.065	C8H8O	0.000463165	0.000323903	0.000560196	2.88893e-05	0.000129992	7.56171e-05	0.000109012	6.4392e-05	3.83415e-05	5.13631e-05	0.000105135	0.000341183	0.000795697	0.000810809	0.000393774	0.000421424	0.000190334	0.000401149		0.000294688	0.000249884		0.000414487	0.00032307	0.000336204		0.00035792	4.94264e-05		0.000555229	0.000354368	0.000812277	0.000386611		0.000527121	0.000209516		0.000519477	0.000288324	0.000282164	0.000286716		0.000226479		0.000320632	0.000114103		2.80088e-05
121.101	C9H12	9.18842e-05	7.42269e-05	0.000120896	3.07823e-07	2.32642e-05	1.96474e-05	2.65305e-05	1.30061e-05	6.45512e-06	1.08214e-05	2.28049e-05	5.78074e-05	0.000112714	0.00012046	7.01071e-05	6.84527e-05	4.91206e-05	8.32082e-05		5.39841e-05	4.06449e-05		0.00026073	0.000228714	0.000233982		0.000241142	1.7167e-05		0.00058708	0.000344781	0.000804609	0.000425174		0.000540411	0.00020292		0.000109212	7.8217e-05	0.000118253	0.000117223	8.5019e-05	0.000200147		0.000118012	4.35809e-05		5.27803e-05
123.044	C7H6O2	0.000149233	0.000149161	0.00016505	1.08763e-05	4.73162e-05	2.64461e-05	3.78271e-05	2.78412e-05	1.01051e-05	2.06272e-05	3.29231e-05	9.55887e-05	0.000234514	0.000133269	0.000136151	8.14721e-05	6.78779e-05	0.00012728		8.63088e-05	6.52715e-05		0.000250672	0.000129131	0.000137582		0.000172462	6.78638e-05		0.000246511	0.000225264	0.000333374	0.000153181		0.000239583	7.41959e-05		0.000246515	0.000134002	7.74988e-05	0.000156562		0.000138584		0.000150632	6.1235e-05		3.20489e-05
123.08	C8H10O	0.000243108	0.000200076	0.000302892	7.98524e-06	4.88004e-05	2.60395e-05	4.82166e-05	2.47079e-05	1.03413e-05	1.82987e-05	2.76061e-05	0.000190942	0.000409973	0.000349769	0.000216517	0.000210791	0.000112276	0.00024791		0.000149792	0.000129822		0.000703281	0.000516739	0.000360651		0.00052689	0.00017154		0.000280539	0.000186884	0.000458094	0.000195931		0.000280362	0.000125772		0.000109602	8.77003e-05	0.000122196	0.000145807		0.000183534		0.000129768	3.66801e-05
125.06	C7H8O2	0.000508318	0.000399447	0.000589107	1.94709e-05	9.6873e-05	6.52442e-05	6.9207e-05	5.53432e-05	2.63061e-05	3.13897e-05	6.24401e-05			0.000847374		0.000417956	0.000225353	0.0004654		0.000258615	0.000260401		0.00103292	0.000468754	0.000302662		0.000601445	0.000382785		0.000560265	0.000390406	0.00101145	0.000378083		0.000585051	0.000296172		0.000257693	0.000188284	0.000151485	0.00028451		0.000262503		0.000228895	5.63325e-05		0.000100051
127.039	C6H6O3	0.000610314	0.000526523	0.000812392	2.60421e-05	0.000114197	6.21135e-05	9.10577e-05	3.88319e-05	1.76869e-05	3.39358e-05	7.75837e-05			0.0010384		0.000409474	0.000217315	0.000565092		0.000309397	0.000329626		0.00033249	0.000100663	6.89882e-05		0.00016738	0.000143864		0.000474664	0.000392977	0.00115826	0.000396552		0.000605613	0.000370354		0.000227261	0.000169212	7.28886e-05	0.000219322		0.000188754		0.000175488	6.19352e-05		7.70092e-05
129.07	C10H8							5.71835e-05			2.95841e-05	5.92516e-05	0.000269084	0.000693954	0.000154202	0.000411291	9.17663e-05				0.00022079	0.00023084		0.000443701				0.000443701			0.000540917		0.000862294	0.000357286		0.000586832	0.000255616		0.000419087	0.000312914	0.000406847	0.000351177	0.000244626	0.000301321		0.000339329	6.65904e-05		8.58328e-05
131.086	C10H10						5.86694e-06		4.98187e-06	2.67332e-06			4.80107e-05	9.93362e-05		6.63843e-05					3.78756e-05	4.00964e-05										7.58541e-05	0.000189751	9.72214e-05		0.000120942	6.05403e-05				8.98772e-05	7.74824e-05	3.44481e-05	6.26694e-05		6.61193e-05	2.38644e-05
137.132	C10H16	5.81922e-05	4.38293e-05	6.01434e-05	1.25846e-06	1.83878e-05	1.54252e-05	2.29533e-05	1.20242e-05	8.62565e-06	1.20769e-05	1.70267e-05	4.7024e-05	7.29615e-05	7.55587e-05	5.35981e-05	6.15357e-05	2.93101e-05	5.36995e-05		3.68684e-05	2.40865e-05		0.000310015	0.000362419	0.000317155		0.000329863	2.84194e-05		0.000474394	0.00028828	0.000570667	0.000349491		0.000420708	0.000126463		0.000262226	0.000163184	0.000196027	0.00014745	9.45577e-05	0.000180533		0.000173996	5.55782e-05		6.95999e-05
143.086	C11H10																																						0.000139732	9.4886e-05	9.64891e-05	8.50121e-05				0.00010403	2.43365e-05
PTR-TOF-MS Extended Analysis																					African grass (3) avg	African grass (3) stdev						Alfalfa Organic CO (2) Avg	Alfalfa Organic CO (2) stdev							Black Spruce AK(1)										Chamise CA (1)
46.0651	C2H7N												0.000275204			0.000411167					0.000343185	9.61402e-05		0.0012321	0.000909107			0.0010706	0.00022839		0.000100931					0.000100931							0.000170847			0.000170847
49.0106	CH4S		1.16215e-05										4.78021e-05			0.000103741					5.43882e-05	4.64116e-05		0.00131342	0.000765454			0.00103944	0.000387472		0.000161891					0.000161891							2.39531e-05			2.39531e-05
60.0444	C2H5NO
60.0808	C3H9N		0.000242503										3.07659e-05			0.000137693					0.000136987	0.000105871		0.00025696	0.000200222			0.000228591	4.01198e-05		4.92596e-05					4.92596e-05							1.61406e-05			1.61406e-05
65.0386	C5H4		2.75151e-05										2.72723e-05			5.66617e-05					3.71497e-05	1.68984e-05		7.76434e-05	3.43121e-05			5.59778e-05	3.06399e-05		7.03537e-05					7.03537e-05							2.39718e-05			2.39718e-05
71.0855	C5H10		0.000142098										5.38529e-05			7.43666e-05					9.01058e-05	4.61799e-05		0.000448253	0.000295928			0.00037209	0.00010771		0.000344445					0.000344445							0.000117858			0.000117858
85.1012	C6H12		5.44147e-05										1.90305e-05			4.01124e-05					3.78525e-05	1.78e-05		0.000182958				0.000182958			0.000126501					0.000126501
87.0804	C5H10O
88.0757	C4H9NO		0.000152449										0.000129419			0.00022331					0.000168393	4.89337e-05		0.000296933	0.000422775			0.000359854	8.89836e-05														5.16287e-05			5.16287e-05
89.0233	C3H4O3		4.97454e-05										3.25083e-05			3.34754e-05					3.85764e-05	9.68476e-06		2.46009e-05	1.00793e-05			1.73401e-05	1.02683e-05		4.58812e-05					4.58812e-05							6.19285e-06			6.19285e-06
90.0913	C4H11NO												2.7431e-05			5.49959e-05					4.12135e-05	1.94913e-05
93.0335	C6H4O		4.10647e-05										9.05177e-06			3.25989e-05					2.75718e-05	1.6588e-05		8.59951e-05				8.59951e-05			1.8351e-05					1.8351e-05
95.0855	C7H10		0.000152507										0.000145625			0.000217106					0.000171746	3.9433e-05		0.00088251	0.000587037			0.000734773	0.000208931		0.00181639					0.00181639							0.000170578			0.000170578
97.0648	C6H8O		0.000474615										0.000365325			0.000505432					0.000448457	7.36255e-05		0.00157494	0.000905281			0.00124011	0.000473517		0.000600158					0.000600158							0.000132031			0.000132031
97.1012	C7H12		0.000124573										4.50154e-05			4.72776e-05					7.22887e-05	4.52937e-05		0.000426152	0.000242253			0.000334203	0.000130036		0.00024851					0.00024851							4.21688e-05			4.21688e-05
99.0804	C6H10O																														0.000148395					0.000148395
101.023	C4H4O3		0.000189873										0.000109456			0.000177446					0.000158925	4.32897e-05		4.7224e-05	2.45859e-05			3.59049e-05	1.60076e-05		0.000121678					0.000121678							1.91822e-05			1.91822e-05
103.039	C4H6O3		0.000388059										0.000280772			0.000418058					0.000362296	7.2178e-05		0.000524509	0.000203859			0.000364184	0.000226734		0.000369942					0.000369942							9.42826e-05			9.42826e-05
103.075	C5H10O2												3.23277e-05			5.59418e-05					4.41347e-05	1.66977e-05		0.000249001	0.000145892			0.000197447	7.2909e-05		9.93474e-05					9.93474e-05							4.14052e-05			4.14052e-05
104.049	C7H5N																														0.000135564					0.000135564
109.065	C7H8O		0.000372023										0.000339303			0.00034892					0.000353415	1.68168e-05		0.00131534	0.000892725			0.00110403	0.000298838		0.000685943					0.000685943							0.000158793			0.000158793
109.101	C8H12																														0.000775744					0.000775744
111.117	C8H14		4.537e-05										1.03113e-05			3.58178e-05					3.04997e-05	1.81243e-05		0.000200531	0.000105382			0.000152956	6.72808e-05		8.36778e-05					8.36778e-05							2.04065e-05			2.04065e-05
115.075	C6H10O2																								0.000183266			0.000183266															3.59753e-05			3.59753e-05
117.055	C5H8O3		0.000369074										0.000288078			0.000482105					0.000379752	9.7453e-05		0.00100934	0.000405551			0.000707443	0.00042694		0.000356002					0.000356002							0.000127142			0.000127142
117.091	C6H12O2																														8.1512e-05					8.1512e-05
123.117	C9H14		5.36624e-05										3.16655e-05			4.42568e-05					4.31949e-05	1.10369e-05		0.00028834	0.000160316			0.000224328	9.05264e-05		0.000506948					0.000506948							2.94098e-05			2.94098e-05
125.023	C6H4O3		0.000313957										0.000203573			0.000264481					0.00026067	5.52905e-05		0.00010622	4.64682e-06			5.54334e-05	7.1823e-05		0.000178041					0.000178041							1.74344e-05			1.74344e-05
127.075	C7H10O2		0.000119449																		0.000119449			0.000647135	0.000279462			0.000463299	0.000259984		0.000164565					0.000164565							2.56012e-05			2.56012e-05
133.065	C9H8O												6.22819e-05			6.21845e-05					6.22332e-05	6.89013e-08
135.044	C8H6O2												2.66553e-05			3.25306e-05					2.9593e-05	4.15444e-06		5.75063e-05	3.35616e-05			4.55339e-05	1.69314e-05		5.61352e-05					5.61352e-05							1.59219e-05			1.59219e-05
135.08	C9H10O		9.61835e-05										4.44705e-05			5.15489e-05					6.40676e-05	2.80374e-05		0.000184597	0.000118759			0.000151678	4.65548e-05		0.000137555					0.000137555							2.08454e-05			2.08454e-05
135.117	C10H14												1.87001e-05			1.42274e-05					1.64637e-05	3.16273e-06		0.000159466				0.000159466			0.0004876					0.0004876
137.06	C8H8O2		0.000103195										9.77461e-05			0.000113551					0.000104831	8.02846e-06		0.00019525	5.50196e-05			0.000125135	9.91579e-05		0.00023445					0.00023445							1.53066e-05			1.53066e-05
137.096	C9H12O		5.23566e-05																		5.23566e-05				0.000249038			0.000249038															4.26145e-05			4.26145e-05
139.039	C7H6O3		9.34439e-05										5.25375e-05			7.31895e-05					7.3057e-05	2.04535e-05		0.000121028	3.02284e-05			7.5628e-05	6.42047e-05		0.000129182					0.000129182							1.31692e-05			1.31692e-05
139.075	C8H10O2		0.000197883										0.00016295			0.000232769					0.000197867	3.49096e-05		0.000570538	0.000276389			0.000423463	0.000207995		0.000251428					0.000251428							3.34581e-05			3.34581e-05
141.055	C7H8O3		8.93933e-05										6.42798e-05			0.000103432					8.57017e-05	1.98355e-05		0.000174187	4.23701e-05			0.000108279	9.32087e-05		6.38546e-05					6.38546e-05							1.66767e-05			1.66767e-05
141.091	C8H12O2																							0.000287471	0.000129725			0.000208598	0.000111543		5.67306e-05					5.67306e-05							1.26192e-05			1.26192e-05
145.065	C10H8O		0.000471673										0.000284665			0.000439438					0.000398592	9.99713e-05		0.000144879	7.60638e-05			0.000110471	4.86597e-05		0.000227394					0.000227394							2.84595e-05			2.84595e-05
145.101	C11H13																							0.000179902	0.000118015			0.000148958	4.37605e-05		0.000150678					0.000150678							3.00898e-05			3.00898e-05
147.08	C10H10O		7.51917e-05										6.26315e-05			7.86324e-05					7.21519e-05	8.42245e-06		0.000223833	0.00015388			0.000188856	4.94643e-05		0.000138549					0.000138549							3.81536e-05			3.81536e-05
147.117	C11H14
149.06	C9H8O2		0.000100177										7.07537e-05			8.67807e-05					8.59038e-05	1.47311e-05		0.000108423				0.000108423			9.85085e-05					9.85085e-05
149.096	C10H12O
149.132	C11H16																							0.000321262				0.000321262			0.000258033					0.000258033
151.075	C9H10O2		0.000226892										0.000187674			0.00026476					0.000226442	3.85449e-05		0.000654916	0.000261826			0.000458371	0.000277957		0.000349713					0.000349713							3.57054e-05			3.57054e-05
151.148	C11H18																														0.00017532					0.00017532
155.07	C8H10O3												7.05044e-05			0.00010185					8.61772e-05	2.21647e-05		0.000230314	0.000167593			0.000198953	4.43503e-05		8.00088e-05					8.00088e-05							7.14953e-05			7.14953e-05
165.091	C10H12O2
[truncated: 122 more columns]

## Sheet: Table S2
Table S2. Emission factors (g /kg) for all fuels. Fires for which EFs are recalculated to include additional ~50 species are highlighted in orange.
Protonated m/z	Formula	Most likely identity	African Grass K1 (flat)	African Grass K1 (flat)	Extended African Grass K1 (flat)	African Grass K1 (mixed upright and flat)	African Grass K1 (upright)	African Grass K1 (upright)	African Grass K1 (upright)	African Grass K2 (upright)	African Grass K3	African Grass K3 (Add to residue of burn 53)	African grass K3 (continued from Burn 40)	African Grass K3 (upright)	African Grass S1	Extended African Grass S1	African Grass S1	African Grass S1	African Grass S2	Extended African Grass S2	African Grass S2	African Grass S3 (feeding fire)	African Grass S3 (mixed upright and flat)		African grass (18) avg	African grass (18) stdev		Alfalfa Organic CO	Extended Alfalfa Organic CO	Alfalfa Organic CO	Extended Alfalfa Organic CO	Alfalfa Organic CO		Alfalfa Organic CO (3) Avg	Alfalfa Organic CO (3) stdev		Black Spruce AK	Extended Black Spruce AK	Black Spruce AK	Black Spruce AK	Black Spruce AK		Black Spruce AK(4) avg	Black Spruce AK(4) stdev		Chamise CA	Chamise CA	Chamise CA	Chamise CA
		Fire #	48	49	49	50	46	47	52	42	53	54	41	40	82	82	83	91	81	81	92	57	58					36	36	65	65	66					39	39	51	74	77					1	2	20	22
	MCE		0.97554	0.973361		0.974749	0.978906	0.98137	0.981555	0.984013	0.983189	0.98107	0.985354	0.981105	0.977828		0.97351	0.970458	0.969917		0.971671	0.980647	0.976253		0.977805	0.00479598		0.914681		0.912323		0.927884		0.918296	0.00838674		0.959392		0.970227	0.951435	0.955903		0.959239	0.00801646		0.902725	0.910554	0.913008	0.928547
	CO2	Carbon dioxide	1555.56	1551.89	1550.6	1550.72	1569.87	1573.56	1574.53	1569.21	1573.04	1570.32	1576.93	1569.06	1589.21	1588.4	1572.37	1558.91	1535.37	1533.87	1537.33	1578.52	1565.4		1565.1	14.1962		1315.25	1306.16	1354.38	1348.92	1384.9		1351.51	34.9136		1725.85	1720.85	1766.74	1679.94	1723.63		1724.04	35.4568		1583.65	1608.43	1628.24	1666.29
	CO	Carbon monoxide	24.8203	27.0281	27.0056	25.5638	21.5267	19.0096	18.8289	16.2237	17.1157	19.2814	14.916	19.2299	22.9318	22.9201	27.2276	30.1985	30.3043	30.2746	28.5221	19.824	24.2308		22.5991	4.8373		78.0708	77.5314	82.8289	82.4955	68.4955		76.4651	7.30037		46.4864	46.3516	34.5006	54.5688	50.5997		46.5389	8.67742		108.595	100.546	98.7258	81.597
	CH4	Methane	0.459295	0.618299	0.617784	0.602289	0.318876	0.229177	0.236684	0.177436	0.125809	0.102469	0.10061	0.177405	0.454083	0.453849	0.626339	0.874702	0.633115	0.632494	0.684088	0.34398	0.553679		0.406574	0.23608		7.43795	7.38657	4.76589	4.74669	3.55878		5.25421	1.98515		1.88953	1.88405	1.05848	2.66825	1.95401		1.89257	0.658577		4.97309	5.13138	3.73868	2.65432
18.0338	NH3	Ammonia	0.074204	0.0777381	0.0776735	0.055954	0.0641362	0.0390284	0.0314752	0.0250841	0.0287828	0.0165923	0.01664	0.00945506	0.120236	0.120174	0.118299	0.268745	0.236479	0.236248	0.271774	0.0534205	0.117673		0.0903176	0.0853144		9.19624	9.1327	5.19967	5.17875	5.00819		6.46803	2.36464		0.34303	0.342036	0.337882	0.344884	0.262247		0.322011	0.0399525		1.45567	1.31397	0.983968	0.943865
	C2H2	Acetylene	0.0738852	0.0852262	0.0851552	0.0808889	0.0716599	0.049573	0.050481	0.0418934	0.0307619	0.0271572	0.0298034	0.0489738	0.0611419	0.0611105	0.0763265	0.126883	0.0644384	0.0643752	0.107406	0.0548245	0.0687596		0.0638935	0.0262728		0.389356	0.386666	0.783929	0.780775	0.679168		0.617484	0.204391		0.710662	0.708602	0.361678	1.04204	0.822795		0.734294	0.283984		1.974	1.87426	1.5648	0.699133
28.0182	HCN	Hydrogen Cyanide	0.0924091	0.117296	0.117199	0.0839428									0.110575	0.110519		0.153696	0.160653	0.160495	0.160092	0.111772			0.123804	0.0304839		1.48588	1.47562	0.929762	0.926016	0.675987		1.03054	0.414245		0.256397	0.255654	0.12638	0.281233	0.279919		0.235982	0.0739538		0.62529	0.585576	0.449358	0.242275
	C2H4	Ethene	0.250124	0.278006	0.277774	0.335404	0.16246	0.120565	0.12405	0.101054	0.0622328	0.0581402	0.0592053	0.0899107	0.224781	0.224666	0.31546	0.504534	0.260398	0.260143	0.373264	0.159824	0.253229		0.207369	0.124872		2.07818	2.06382	2.13321	2.12462	2.19512		2.1355	0.0585037		1.984	1.97825	1.05066	2.91959	2.29432		2.06214	0.77853		4.44475	4.29946	3.17806	1.89749
31.0178	HCHO	Formaldehyde	0.540876	0.564866	0.564395	0.680975	0.388529	0.245081	0.254894	0.153416	0.132742	0.125855	0.092495	0.16465	0.427738	0.427519	0.691539	1.11936	0.603883	0.603291	0.700624	0.262463	0.534203		0.426899	0.27521		0.9949	0.988026	0.93553	0.93176	1.70709		1.21251	0.429349		1.44795	1.44375	0.836628	2.10975	1.63559		1.50748	0.526855		2.99399	2.48937	1.96198	1.61044
	NO	Nitric oxide	1.29799	1.0867	1.0858	1.10994	1.39294	1.14767	1.16349	1.17815	1.28616	1.26946	1.14781	1.31167	1.68495	1.68409	1.70551	1.63783	2.03054	2.02855	1.95634	1.89663	1.80065		1.45025	0.322023		2.22416	2.2088	2.36168	2.35217	3.08847		2.5581	0.464429		2.10779	2.10168	1.89874	1.63422	1.88549		1.88156	0.193793		1.2626	1.73324	1.65026	1.94676
33.0335	CH3OH	Methanol	0.190931	0.255972	0.255758	0.273629	0.0807693	0.0553736	0.0194709	0.0373177	0.0354905	0.0268803	0.0209498	0.0425405	0.150937	0.150859	0.352303	0.431221	0.316551	0.316241	0.25703	0.0656937	0.219733		0.157377	0.132475		6.74971	6.70308	1.65988	1.6532	1.93038		3.44666	2.86372		0.80815	0.805808	0.942958	1.41746	0.600372		0.942235	0.346741		1.35113	1.53303	0.8039	1.02548
	HCl	Hydrocholoric acid	0.252169	0.265002	0.264782	0.259431	0.323946	0.218167	0.22059	0.17192	0.33458	0.3109	0.373547	0.245439	0.195579	0.195478	0.232548	0.190052	0.348632	0.34829	0.275029	0.185756	0.262411		0.259205	0.0593491		0.0704702	0.0699833	0.0438396	0.0436631			0.0571549	0.0188307		0.0191591	0.0191035	0.0293819	0.0723358	0.0872272		0.052026	0.0328867			0.0282886
43.0542	C3H6	Propene	0.0552543	0.0630744	0.0630221	0.0865403												0.125745	0.0831197	0.083038	0.102514				0.0860413	0.0258141		1.65073	1.63932	0.998896	0.994875	1.0647		1.23811	0.358852		0.546397	0.544813	0.283374	0.819162	0.53233		0.545316	0.218918		0.963106	0.923401	0.557102	0.471078
47.0128	HCOOH	Formic acid	0.0648291	0.104947	0.10486	0.0908061	0.0722236	0.0530005	0.0556254	0.0309496	0.0211617	0.0267305	0.0243627	0.0581388	0.043451	0.0434287	0.106792	0.198334	0.0683909	0.0683236	0.0777964	0.00924844	0.062914		0.0649834	0.0434313		0.256293	0.254522	0.0230719	0.0229791			0.139682	0.164912		0.271338	0.270551	0.150244	0.555735	0.337266		0.328646	0.170054		0.238559	0.254844	0.154729	0.214007
	NO2	Nitrogen dioxide	1.21706	1.15222	1.15126	0.9896	1.20729	0.977869	1.01554	0.85803	0.732199	0.813485	0.696469	1.08624	0.924514	0.924039	1.0506	1.08816	1.2376	1.23638	1.02574	0.638311	1.03571		0.985924	0.178556		1.15692	1.14892	1.04249	1.03829	1.73405		1.31115	0.370681		2.56008	2.55266	1.81743	2.41822	2.63638		2.35803	0.371562		0.705042	0.78109	1.02908	1.69245
	HONO	Nitrous acid	0.171369	0.161558	0.161423	0.203187		0.137278	0.153779	0.111303	0.145044	0.163647	0.148097	0.14024	0.149153	0.149077	0.198447	0.234086	0.199561	0.199366	0.184157	0.218704	0.197758		0.17161	0.0330775		0.661692	0.65712	0.249052	0.248049			0.455372	0.291781		0.477628	0.476243	0.506654	0.578992	0.539262		0.525634	0.0435799		0.872793	0.899428	0.72081	0.873037
61.0284	CH3COOH	Acetic Acid	0.722312	0.85567	0.854958	0.95856	0.256107				0.2153		0.197438	0.217005	0.572792	0.572498	1.50338	1.6383	1.10214	1.10106	0.759722	0.31883	0.824605		0.72444	0.469792		13.435	13.3422	2.08591	2.07751	1.09048		5.53713	6.85784		1.47681	1.47253	0.683494	2.8698	1.48753		1.62941	0.908615		2.24516	2.56621	1.36943	2.00566
	C2H4O2	Glycolaldehyde																0.321723	0.0405562	0.0405165					0.18114	0.198815		0.0624264	0.0619951					0.0624264	#DIV/0!		0.314155	0.313244	0.122239	0.650419	0.444073		0.382721	0.222095		0.177055	0.095369
	SO2	Sulfur dioxide	0.510356	0.621262	0.620746	0.731498	1.25244	0.710207	0.748246	0.75691	0.922656	1.09563	0.786108	1.15486	0.95435	0.953858	1.19348	0.916789	1.43886	1.43745	1.51683		0.915729		0.954483	0.283765		1.60815	1.59704	0.725475	0.722555			1.16681	0.624145		0.938524	0.935802	0.919691				0.929107	0.0133169			0.406387	0.308296
69.0335	C4H4O	Furan	0.0782425	0.0843495	0.0842793	0.092699	0.0045677	0.0457226	0.0545223	0.0143702	0.0101675	0.00722827	0.00654683	0.0168149	0.0663359	0.0663019	0.186737	0.122754	0.10605	0.105946	0.101299	0.10612	0.0927047		0.0594409	0.0421082		0.349817	0.3474	0.161717	0.161066	0.138623		0.216719	0.115843		0.0893332	0.0890742	0.0999441	0.184317	0.115091		0.122171	0.0427575		0.363029	0.257875	0.104117	0.107219
PTR-TOF-MS																									African grass (18) avg	African grass (18) stdev
41.0386	C3H4	Propyne1																																												0.411343	0.306832	0.331094	0.288214
42.0338	C2H3N	Acetonitirile	0.0321289	0.0258943	0.0258728	0.0198412	0.000985408	0.00598472	0.00322208	0.00442249	0.00394015	0.00235385	0.00273822	0.00480253	0.0209621	0.0209514	0.0340449	0.0458735	0.0505874	0.0505379	0.0475833	0.0105968	0.0278565		0.019101	0.0172557		0.563242	0.559351	0.783196	0.780042	0.667751		0.671396	0.110022		0.0602445	0.0600698	0.0309081	0.0693923	0.0417192		0.050566	0.0174433				0.129812	0.0887324
43.0178	C2H2O	Ketene Fragments	0.325746	0.282957	0.282722	0.46029	0.0144593	0.0721161	0.03875	0.0499693	0.0358715	0.0283704	0.0235859	0.0629196	0.199618	0.199516	0.622791	0.886487	0.351529	0.351184	0.337128	0.159036	0.325912		0.237641	0.24008		1.98044	1.96676	0.820317	0.817014	0.558053		1.1196	0.756951		0.649195	0.647313	0.346691	1.30737	0.561796		0.716263	0.414065		1.11496	1.45274	0.640364	0.843817
45.0335	C2H4O	Acetaldehyde	0.466409	0.371275	0.370966	0.64708	0.0184144	0.104215	0.052979	0.0805303	0.0499543	0.0342975	0.0329549	0.0734986	0.285137	0.284991	0.645569	1.03329	0.466815	0.466358	0.56131	0.157268	0.3869		0.303772	0.2887		5.04502	5.01016	1.80717	1.7999	2.45674		3.10298	1.71293		0.865344	0.862835	0.743584	1.56633	0.698282		0.968385	0.404824		1.6397	1.63804	0.969414	0.952826
51.0229	C4H2	1,3-Butadiyne		0.000894702	0.000893957	0.000555007	0.000130035			0.000100133	0.000111228	3.91031e-05	5.56747e-05		0.000334966	0.000334794	0.000496456	0.000518193	0.000382362	0.000381987	0.000242278	0.000128543	0.000134921		0.000294543	0.000248798		0.0024272	0.00241042	0.00395291	0.00393699	0.00439291		0.00359101	0.00103162		0.00418068	0.00416857	0.00139737	0.00622998	0.00222961		0.00350941	0.00215644		0.00323278	0.00390325	0.00789085	0.00236731
53.0386	C4H4	Butenyne	0.00907518	0.00873803	0.00873078	0.0108306	0.000434957	0.0016685	0.00101269	0.00176021	0.000973135	0.000728874	0.000749326	0.00153425	0.0063981	0.0063948	0.0169097	0.0231216	0.00949408	0.00948476	0.0105388	0.00417897	0.00812174		0.00645937	0.0063366		0.0418497	0.0415605	0.0415911	0.0414236	0.0368426		0.0400945	0.00281917		0.0399626	0.0398467	0.0165839	0.0712819	0.0372898		0.0412795	0.022566		0.074857	0.045768	0.0571343	0.0369255
55.0178	C3H2O	2-Propynal	0.0152245	0.0130065	0.0129957	0.0160115	0.000724784	0.0037243	0.00204706	0.00284904	0.00203174	0.0015454	0.00146569	0.00376103	0.00871485	0.00871038	0.0233679	0.0295975	0.0144251	0.014411	0.0140623				0.00953495	0.00877892		0.0262103	0.0260293	0.0185174	0.0184428	0.0252124		0.0233134	0.00418329		0.0328068	0.0327117	0.0164763	0.0605328	0.0302586		0.0350186	0.0184602		0.0416973	0.0217496	0.0187406	0.0245823
55.0542	C4H6	1,3-Butadiene	0.0173609	0.0243122	0.024292	0.0368552	0.000592682	0.00707126	0.0044108	0.00621096	0.00345385	0.00256724	0.00192299	0.00562978	0.0194009	0.019391	0.0433838	0.0580105	0.0319934	0.031962	0.0345238	0.0124394	0.0257762		0.018662	0.0168079		0.170026	0.168851	0.219453	0.218569	0.211024		0.200168	0.0264415		0.175293	0.174785	0.0852711	0.318719	0.143616		0.180725	0.0992646		0.302719	0.198925	0.230805	0.194403
57.0335	C3H4O	Acrolein	0.179971	0.134293	0.134182	0.194707	0.00834382	0.0423631	0.0237829	0.0330314	0.0213484	0.0152712	0.0141156	0.0307014	0.115528	0.115469	0.258804	0.390528	0.165645	0.165483	0.208959	0.0627654	0.143778		0.113552	0.105759		0.432637	0.429648	0.392471	0.390892	0.472863		0.432657	0.040196		0.402754	0.401586	0.195092	0.684368	0.333661		0.403969	0.205911		0.831763	0.46952	0.5108	0.478631
57.0699	C4H8	1-Butene		0.0340617	0.0340334	0.0316381		0.00830246	0.00289011	0.00560098	0.00183044		0.000920761		0.012115	0.0121088	0.0206146	0.0434712	0.0238101	0.0237867	0.0247375		0.0187932		0.0175989	0.0136661		0.252753	0.251006	0.241516	0.240544	0.196712		0.230327	0.0296487		0.129951	0.129575	0.0729839	0.23347	0.06506		0.125366	0.0776492		0.0953585	0.313616	0.124091	0.186462
59.0491	C3H6O	Acetone	0.110054	0.105401	0.105313	0.147522	0.00341117	0.0232829		0.0190503	0.0123428	0.00994119	0.0238891		0.0777371	0.0776971	0.180612	0.233884	0.134438	0.134307	0.137525		0.0772598		0.0864234	0.0712184		0.94255	0.936037	0.815923	0.81264	0.72128		0.826584	0.11102		0.277398	0.276593	1.87897	0.497706	0.212484		0.716639	0.784442		0.523932	0.309201
63.0263	C2H6S	Dimethyl Sulfide1	0.00472106	0.00440319	0.00439953	0.0047018	0.000315163	0.00115645																	0.00305953	0.00214572																				0.0224851	0.0124925
67.0542	C5H6	1,3-Cyclopentadiene	0.00885203	0.00829419	0.00828731	0.0125034	0.000470509	0.00247808	0.00168148	0.00257254	0.00138056	0.000836131	0.000982312	0.00213379	0.0078642	0.00786017	0.0176279	0.0208853	0.0118586	0.011847	0.0132873	0.00578637	0.00998549		0.00719334	0.00620805		0.0795582	0.0790085	0.0977727	0.097379	0.0853589		0.0875633	0.00930518		0.109278	0.108961	0.0461776	0.184237	0.0931964		0.108222	0.057314		0.15702	0.0985389	0.108298	0.0695121
68.9971	C3O2	Carbon suboxide								0.000454639			0.000254774									0.00046975	0.000216795		0.00034899	0.000131779				0.00122748	0.00122254	0.000982337		0.00110491	0.000173342
69.0699	C5H8	Isoprene		0.0339059	0.0338777	0.0398995		0.01164	0.00680573	0.00770825	0.00425798	0.00269771		0.00680479	0.0193231	0.0193132	0.0404212	0.0617606	0.0373555	0.0373189	0.0358813	0.0252825	0.0309927		0.0243158	0.017505		0.445949	0.442869	0.443798	0.442012	0.400343		0.43003	0.0257322		0.434782	0.433522	0.210377	0.783128	0.332072		0.44009	0.2464		0.743656	0.572585	0.519427	0.494699
71.0491	C4H6O	Methyl Vinyl Ketone, Crotonaldehyde, Methacrolein (~50, 30, 20%)	0.107069	0.0854203	0.0853491	0.135867	0.00424323	0.0207947	0.0109041	0.0165888	0.0100811	0.00652232	0.00654923	0.0134414	0.0748093	0.074771	0.184429	0.235157	0.116305	0.116191	0.125248	0.0379053	0.101193		0.0718071	0.0692055		0.333443	0.331138	0.265509	0.264439	0.29765		0.298867	0.0339834		0.225114	0.224461	0.109891	0.396896	0.186738		0.22966	0.121347		0.425018	0.227869	0.25182	0.234429
73.0284	C3H4O2	Methylglyoxal2	0.127423	0.102386	0.102301	0.149389	0.00645332	0.0307855	0.0167823	0.0215626	0.0150918	0.0120464	0.00947048	0.0278391	0.0755675	0.0755288	0.206766	0.288134	0.131666	0.131537	0.132957	0.0586855	0.115595		0.0849223	0.078778		0.140711	0.139739	0.096512	0.0961234	0.108966		0.115396	0.0227903		0.196462	0.195892	0.0970892	0.420201	0.179035		0.223197	0.138298		0.263219	0.147031	0.148356	0.165859
73.0648	C4H8O	Methyl Ethyl Ketone	0.0246762	0.0262604	0.0262385	0.0351913	0.000493138	0.00500557	0.00241676	0.00367066	0.00146999	0.001407	0.0013414	0.00407485	0.0172098	0.017201	0.0421833	0.0508621	0.0334919	0.0334591	0.0293419	0.0112125	0.0257273		0.0175576	0.0162483		0.356974	0.354507	0.271824	0.27073	0.232462		0.287087	0.0636437		0.0594183	0.0592461	0.0287589	0.123787	0.0414782		0.0633606	0.0422019		0.117657	0.0738029	0.0691143	0.0699043
75.0441	C3H6O2	Hydroxyacetone5,8	0.135211	0.121436	0.121334	0.190699	0.00390322	0.0243862	0.0127939	0.0171137	0.0100755	0.0064683	0.00611146	0.0152571				0.359899			0.159483	0.0573686	0.142109		0.0841543	0.101099		1.54404	1.53337	0.68916	0.686387	0.407454		0.880218	0.59189		0.258303	0.257554	0.112449	0.57552	0.224602		0.292718	0.198577				0.208086	0.265995
79.0542	C6H6	Benzene	0.0631267	0.0517052	0.0516622	0.0562415	0.00309048	0.01948	0.0126546	0.0202353	0.0132851	0.0110244	0.0126341	0.0198721	0.0421133	0.0420917	0.0724038	0.088709	0.0576529	0.0575964	0.0778807	0.0260277	0.0485405		0.0387043	0.0265422		0.256231	0.254459	0.773805	0.770691	0.547066		0.525701	0.259448		0.612005	0.610231	0.305338	0.91378	0.549904		0.595257	0.250231		1.44629	0.907264	1.12397	0.537299
81.0335	C5H4O	2,4-Cyclopentadiene-1-one	0.0368734	0.0295879	0.0295632	0.0426986	0.00164601	0.00699289	0.00401385	0.00492654	0.00351682	0.00244921	0.00233589	0.00570439	0.0232371	0.0232251	0.0670754	0.0887606	0.0436583	0.0436155	0.0419887	0.0132691	0.0311743		0.0249949	0.025083		0.16102	0.159908	0.113673	0.113216	0.113433		0.129375	0.0274053		0.0871297	0.0868771	0.0434469	0.146078	0.0631078		0.0849406	0.0445008		0.147309	0.0779727	0.0985147	0.105374
83.0491	C5H6O	2-Methylfuran9,19,20	0.0789764	0.0668806	0.066825	0.100158	0.002782	0.0124162	0.00673739	0.00971749	0.00611584	0.0038263	0.00375728	0.00838037	0.052157	0.0521302	0.13846	0.15828	0.095822	0.0957277	0.0823536	0.0312886	0.0782203		0.0520183	0.0499878		0.383137	0.380489	0.277108	0.275992	0.216535		0.29226	0.0843282		0.140616	0.140209	0.0680094	0.280185	0.11117		0.149995	0.0917722		0.220611	0.133213	0.134256	0.145783
83.0855	C6H10	Assorted HCs20		0.00666933	0.00666378	0.00692309		0.00180528	0.00104124	0.000658939	0.000443138	0.000347778		0.000118909	0.00335945	0.00335773	0.0076857	0.0103629	0.00635861	0.00635238	0.00552366	0.00297223	0.00486658		0.00394246	0.00322468		0.069378	0.0688986	0.056688	0.0564598	0.0595251		0.0618637	0.00666039		0.0416632	0.0415424	0.023849	0.0799655	0.0238548		0.0423331	0.026456		0.0117151	0.0338326	0.0313977	0.0464576
85.0284	C4H4O2	2-Furanone2,8,14,16	0.154681	0.129961	0.129853	0.187465	0.00687233	0.0300773	0.0159919	0.0199166	0.0137918	0.00919459	0.00826357	0.0224911	0.0968448	0.0967952	0.281408	0.367194	0.169551	0.169385	0.15604	0.0589984	0.143583		0.104018	0.104107		0.278934	0.277006	0.147259	0.146666	0.111373		0.179189	0.0882258		0.191545	0.190989	0.107253	0.402885	0.153622		0.213826	0.130668		0.290621	0.178714	0.158423	0.226373
85.0648	C5H8O	Pentenone20	0.0281812	0.0246566	0.0246361	0.0409978	0.000642837	0.00497314	0.00261935	0.00382838	0.00236851	0.00142201	0.00144774	0.00325239	0.0193174	0.0193075	0.0492541	0.0582426	0.0349329	0.0348986	0.0300562	0.0123541	0.0295562		0.0193391	0.0184058		0.188978	0.187672	0.142996	0.14242	0.117358		0.149777	0.0362884		0.0768917	0.0766687	0.0379042	0.139638	0.0612739		0.0789269	0.0435296		0.115644	0.0718565	0.0665507	0.0646611
87.0441	C4H6O2	2,3-Butanedione12	0.114972	0.0974484	0.0973675	0.152052	0.00507393	0.0221865	0.0125579	0.016491	0.0110653	0.00790505	0.00689984	0.0183173	0.0756252	0.0755864	0.220061	0.275206	0.13903	0.138894	0.125913	0.0463725	0.109394		0.0809206	0.0799518		0.686102	0.681362	0.384524	0.382975	0.316808		0.462478	0.196601		0.185736	0.185198	0.0856455	0.368187	0.149611		0.197295	0.121212		0.338674	0.21301	0.18304	0.236001
89.0597	C4H8O2	Ethyl acetate14	0.0174388	0.0166314	0.0166176	0.023584	0.000604408	0.00289613	0.0015664	0.00197557	0.00126979	0.000714301	0.000657949	0.00168902	0.0125247	0.0125182	0.0373808	0.0437749	0.0261556	0.02613	0.0196966	0.00723797	0.018052		0.0129917	0.0133727		0.157204	0.156118	0.0922665	0.0918951	0.0442521		0.0979075	0.0566868		0.0268564	0.0267785	0.0115993	0.0615182	0.0190948		0.0297672	0.0220648		0.0509519	0.0328807	0.032891	0.0406093
91.0542	C7H6	Unknown								0.00039988		0	0.000179875	0.00169812	0.00229415	0.00229298	0.00525976	0.00855265	0.00485926	0.0048545	0.00428305	0.00222592	0.0032247		0.00299794	0.00259996		0.0526128	0.0522492	0.04206	0.0418906	0.034107		0.0429266	0.00928329		0.0298876	0.0298009		0.0571672	0.0261146		0.0377231	0.0169444		0.0484908	0.025795	0.0337933	0.026242
93.0699	C7H8	Toluene	0.0255762	0.0318456	0.0318191	0.0443031	0.000827492	0.0085533	0.019464	0.010434	0.00718748	0.00371404	0.00237948	0.00896144	0.0269349	0.0269211	0.0588955	0.0678607	0.047268	0.0472217	0.0408537	0.0123614	0.0357395		0.0251755	0.0203905		0.432754	0.429764	0.527078	0.524955	0.406016		0.455283	0.0635976		2.6225	2.6149	0.969523	3.78775	2.03653		2.35408	1.17549		0.686473	0.44274	0.404387	0.355337
95.0491	C6H6O	Phenol	0.0589099	0.04755	0.0475104	0.0658541	0.00266984	0.0119427	0.00620026	0.010218	0.00640219	0.00385759	0.00499468	0.00849969	0.0411326	0.0411115	0.0948935	0.104802	0.0549947	0.0549408	0.0643343	0.0241179	0.0503308		0.0367614	0.0326721		0.458631	0.455463	0.406867	0.405229	0.296805		0.387434	0.0826446		0.197961	0.197387	0.0954756	0.341644	0.14635		0.195358	0.10612		0.538794	0.288797	0.332073	0.238517
97.0284	C5H4O2	2-Furaldehyde (furfural)2,8,9,13,14,19	0.375113	0.295425	0.295179	0.389183	0.0125845	0.057632	0.0312966	0.0374631	0.0296942	0.0194993	0.0182701	0.04337	0.16523	0.165146	0.521184	0.632192	0.32055	0.320236	0.286158	0.105898	0.255037		0.199766	0.192503		0.306477	0.304361	0.18735	0.186596	0.219775		0.237867	0.0615899		0.276738	0.275936	0.143102	0.578617	0.230981		0.30736	0.189149		0.402782	0.237778	0.237412	0.300583
99.0441	C5H6O2	2-Furan Methanol (furfuryl alcohol)13,14,16	0.13988	0.121433	0.121332	0.194541	0.004946	0.0220607	0.0115751	0.0153563	0.00931406	0.00578346	0.00596927	0.0156227	0.102736	0.102684	0.309843	0.367273	0.179167	0.178992	0.147129	0.0557993	0.145004		0.102968	0.108987		0.384564	0.381906	0.199302	0.1985	0.112688		0.232185	0.138889		0.182471	0.181942	0.0864388	0.402828	0.147908		0.204911	0.137792		0.320826	0.200562	0.166551	0.214247
101.06	C5H8O2	Unknown	0.032202	0.0294524	0.0294279	0.0441285	0.000981618	0.0054944	0.00281653	0.00363476	0.00266241	0.00130298	0.00148369	0.00350241	0.0236204	0.0236083	0.0711259	0.0802128	0.0448121	0.0447682	0.0349667	0.0141117	0.0348624		0.0239652	0.0245974		0.156062	0.154984	0.0916532	0.0912842	0.0561239		0.10128	0.0506597		0.0574775	0.0573108	0.0265342	0.125865	0.0480488		0.0644814	0.0429225		0.09195	0.0614903	0.0621635	0.0744372
103.054	C8H6	Ethynyl Benzene (phenylacetylene)																																														0.0580682	0.066486
105.07	C8H8	Styrene	0.00680812	0.00583919	0.00583434	0.00699759	0.000289226	0.0018556	0.0011782	0.00172714	0.00100257	0.000585414	0.000904051	0.00134872	0.00493461	0.00493208	0.0085849	0.0109328	0.00742631	0.00741902	0.0090325	0.00218763	0.0061107		0.00431918	0.00344656		0.0878157	0.0872091	0.124302	0.123802	0.100558		0.104225	0.0185175		0.0749467	0.0747293	0.0357515	0.118992	0.0629695		0.0731649	0.0346747		0.160978	0.0871733	0.11134	0.0624217
107.049	C7H6O	Benzaldehyde20	0.0126922	0.00970496	0.00969688	0.0106843	0.000632898	0.00337983	0.00185628	0.00236581	0.00169126	0.00122676	0.00129495	0.00234532	0.00703678	0.00703316	0.0144334	0.0182894	0.0116994	0.0116879	0.0140723	0.00457246	0.00853393		0.00702846	0.00560272		0.0585267	0.0581223	0.0802323	0.0799093	0.117651		0.08547	0.0299081		0.0689147	0.0687149	0.0364475	0.101217	0.0569782		0.0658893	0.0271012		0.159567	0.0708256	0.101414	0.0693513
107.086	C8H10	Xylenes/ethylbenzene	0.00983652	0.00861237	0.0086052	0.0125233	0.000406561	0.00246879	0.00230605	0.00251004	0.00156854	0.000693045	0.00110859	0.00231328	0.00761747	0.00761356	0.0142725	0.0169823	0.0125477	0.0125355	0.011948	0.0057821	0.0107294		0.00690148	0.00540532		0.140713	0.139741	0.171562	0.170871	0.125295		0.145857	0.0235585		0.199785	0.199205	0.0881059	0.298194	0.165232		0.187829	0.0871372		0.205356	0.115584	0.12275	0.0947036
109.028	C6H4O2	Unknown								0.0031519			0.00151617												0.00233403	0.00115664																				0.62915	0.194594	0.370886	0.359974
111.044	C6H6O2	Catechol (Benzenediols)8,10,13,16,19,21; Methylfurfural11,14,16,19	0.0874218	0.0748583	0.074796	0.110249	0.00287674	0.0127329	0.00659307	0.00891376	0.00567143	0.00302987	0.00326504	0.00694314	0.0527669	0.0527398	0.155665	0.182258	0.100288	0.10019	0.0841422	0.0322073	0.0864477		0.0564628	0.0565123		0.315092	0.312915	0.14915	0.148549	0.0942597		0.186167	0.114976		0.140079	0.139672	0.0743778	0.313878	0.113296		0.160408	0.10581		0.512017	0.547916	0.112088	0.48501
111.08	C7H10O	Unknown	0.0189621	0.0166806	0.0166667	0.0266365	0.000528915	0.00292271	0.00157404		0.00135553	0.000761624		0.00184075	0.0130892	0.0130825	0.0323629	0.0337917	0.0232734	0.0232506	0.0184868	0.00687561	0.0191766		0.0136449	0.0116746		0.277507	0.275589	0.185243	0.184498	0.113474		0.192075	0.0822296		0.0525931	0.0524406	0.0239678	0.0944073	0.0380817		0.0522625	0.0304301		0.033451	0.0332746	0.0214668	0.0283916
113.023	C5H4O3	Unknown	0.0400824	0.0376415	0.0376101	0.0433726	0.00191896	0.00807061	0.00448159	0.00507848	0.00386166	0.00251188	0.00281242	0.00717248	0.0211194	0.0211086	0.0683109	0.0883369	0.0475466	0.0474999	0.0376798	0.0160986	0.0346572		0.026153	0.0252573		0.0492342	0.0488941	0.0250294	0.0249286	0.0185341		0.0309326	0.016179		0.0641892	0.064003	0.0323913	0.143177	0.0504993		0.0725642	0.0488434		0.087815	0.0486432	0.0426421	0.0635605
113.06	C6H8O2	2-Hydroxy-3-Methyl-2-Cyclopentenone8,14	0.0503601	0.0452318	0.0451941	0.070366	0.00145656	0.00733726	0.00408747	0.00494563	0.00319002	0.00160409	0.00163605	0.00459786				0.124341			0.0534851	0.0172078	0.0510256		0.0293915	0.0357874		0.419011	0.416114	0.206589	0.205758	0.0954945		0.240365	0.164382		0.0849741	0.0847278	0.0380118	0.196975	0.0701035		0.0975161	0.0691414		0.128724	0.0875204	0.0706631	0.10096
115.039	C5H6O3	Unknown							0.0139115	0.0173311	0.0103296	0.00879858	0.00895661	0.0290105				0.339395			0.107533	0.0477021	0.0936561		0.0676624	0.10199		0.0772348	0.0767012	0.0310995	0.0309743	0.0183184		0.0422176	0.0309918		0.0919638	0.0916972	0.0457883	0.213268	0.0734064		0.106107	0.073917		0.144898	0.0969809	0.0748717	0.12372
117.07	C9H8	Unknown																				0.0126028	0.0361603		0.0243816	0.0166577				0.0541932	0.0539749	0.0309203		0.0425567	0.0164564
119.049	C8H6O	Benzofuran20	0.00689001	0.00523215	0.00522779	0.00690729	0.000344618	0.00165675	0.000874127	0.00135569	0.000880032	0.000611881	0.000730383	0.00104773	0.00429441	0.0042922	0.00935024	0.0118349	0.00668416	0.00667761	0.00747629	0.00235194	0.00508931		0.00408955	0.00349541		0.0382522	0.037988	0.0463085	0.0461222	0.0393978		0.0413195	0.0043584		0.0237804	0.0237114	0.0141484	0.0422077	0.0196265		0.0249408	0.0121684		0.0584326	0.032543	0.0314659	0.0265647
119.086	C9H10	Assorted HCs20	0.00374282	0.00297712	0.00297464	0.00376917	9.41606e-05	0.000775871	0.000691641	0.000787479	0.000457857	0.000228305	0.000273499	0.000378334	0.00236518	0.00236397	0.00474077	0.0054156	0.00358009	0.00357658	0.00350033	0.00273928	0.0029975		0.00219528	0.00174013		0.0388867	0.038618	0.0491875	0.0489894	0.0431804		0.0437515	0.0051741		0.0480314	0.0478922	0.0225063	0.0812335	0.0413966		0.048292	0.024479		0.072763	0.0391978	0.046405	0.0309229
121.065	C8H8O	Vinylphenol4	0.0492681	0.0375192	0.037488	0.0613746	0.00266525	0.0105904	0.00610194	0.00757961	0.00472335	0.00316834	0.00328343	0.00866456	0.0335313	0.033514	0.0928497	0.104937	0.0511417	0.0510916	0.0515139	0.0161708	0.0416578		0.0325967	0.0314656		0.138683	0.137725	0.114684	0.114222	0.0986935		0.117353	0.020128		0.110617	0.110296	0.0523968	0.189964	0.0838388		0.109204	0.0588632		0.241768	0.124242	0.119386	0.100265
121.101	C9H12	Trimethylbenzene; Assorted HCs20	0.00977396	0.00859804	0.00859089	0.0132453	2.83989e-05	0.00189533	0.00158545	0.00184467	0.000954041	0.000533417	0.000691767	0.00187943	0.00568127	0.00567836	0.0131526	0.0155902	0.00910522	0.00909629	0.0083675	0.00417329	0.00864085		0.00587449	0.00503961		0.0872375	0.0866347	0.081189	0.0808623	0.0686861		0.0790375	0.00946098		0.116962	0.116623	0.0509793	0.188171	0.0922014		0.112078	0.0575677		0.0508278	0.0337044	0.0500339	0.0409929
123.044	C7H6O2	Salicylaldehyde7,11	0.0161389	0.017566	0.0175514	0.0183841	0.00102015	0.00391909	0.00216964	0.00267396	0.00207627	0.000848951	0.00134059	0.00275854	0.00955097	0.00954607	0.0278215	0.0175355	0.0179774	0.0179598	0.0101249	0.00586303	0.0134378		0.00951152	0.00816974		0.0852699	0.0846808	0.0466032	0.0464154	0.0410606		0.0576446	0.0240842		0.0499303	0.0497855	0.0338626	0.0792644	0.0337719		0.0492073	0.0214294		0.116642	0.0587052	0.0333371	0.0556623
123.08	C8H10O	Xylenol (2,5-Dimethyl phenol)7,13	0.026291	0.0235619	0.0235424	0.0337377	0.000748975	0.00404202	0.00213629	0.00340838	0.00184261	0.000868791	0.00118926	0.00231304	0.0190784	0.0190686	0.0486369	0.0460223	0.028589	0.028561	0.026196	0.00969799	0.0261736		0.0169186	0.0161		0.239232	0.237579	0.18649	0.185739	0.107635		0.177786	0.0662289		0.0568226	0.0566578	0.0280931	0.108918	0.0431968		0.0592576	0.0351248		0.0518598	0.0384207	0.0525641	0.0518389
125.06	C7H8O2	Guaiacol (2-Methoxyphenol)2,4,8,10,13,14,16	0.0558735	0.0478121	0.0477723	0.0666936	0.00185621	0.0081553	0.0054404	0.00497237	0.00419491	0.00224626	0.0020735	0.00531744				0.113325			0.0527929	0.0197842	0.049941		0.0293652	0.0333978		0.357124	0.354656	0.171945	0.171253	0.0918086		0.206959	0.136079		0.115341	0.115006	0.0596496	0.24443	0.0847226		0.126036	0.0821492		0.12393	0.0838377	0.0662314	0.10281
127.039	C6H6O3	Hydroxymethylfurfural8,13,14	0.0681667	0.0640391	0.0639858	0.0934553	0.0025227	0.00976881	0.00526288	0.00664782	0.00299087	0.00153463	0.00227784	0.00671366				0.141112			0.0525557	0.0193863	0.0616167		0.0358701	0.0424803		0.11681	0.116003	0.0375201	0.0373691	0.0212642		0.0585314	0.051121		0.0992944	0.0990065	0.0610108	0.284422	0.0902945		0.133755	0.101765		0.111057	0.0765606	0.0323819	0.0805321
129.07	C10H8	Naphthalene20								0.00424104			0.00201727	0.00520868	0.0282084	0.0281939	0.0863758	0.0212876	0.0569778	0.056922	0.0119651				0.0270352	0.030003		0.158355	0.157261					0.158355			0.11495	0.114617		0.215106	0.0826448		0.137567	0.0690662		0.208049	0.143827	0.183617	0.130994
131.086	C10H10	Assorted HCs20 inc. Dihydronaphthalene							0.000512886		0.000395889	0.000239318			0.00511166	0.00510904	0.0125575		0.00934019	0.00933103					0.00469291	0.00528007													0.0121504	0.0480743	0.02284		0.0276882	0.0184462				0.041197	0.0293537
137.132	C10H16	Terpenes (α-Pinene)	0.0070154	0.00575388	0.00574909	0.00746783	0.000131582	0.00169779	0.0014107	0.00180874	0.000999612	0.000807815	0.000874965	0.00159033	0.00523768	0.005235	0.00964905	0.0110828	0.00788924	0.00788151	0.0085249	0.00282221	0.00632002		0.0045047	0.00353242		0.117558	0.116746	0.145806	0.145218	0.105515		0.12296	0.0206815		0.107114	0.106803	0.0483084	0.151254	0.0858945		0.0981427	0.0429526		0.138314	0.0796934	0.0939998	0.0584387
143.086	C11H10	Methyl-Naphthalenes7																																												0.0769548	0.0483833	0.0483102	0.0351791
PTR-TOF-MS Extended Analysis																									African grass (3) avg	African grass (3) stdev								Alfalfa Organic CO (2) Avg	Alfalfa Organic CO (2) stdev								Black Spruce AK(1)
46.0651	C2H7N	Dimethylamine6,15,18; Ethylamine6,15,18														0.0101374				0.0200056					0.0150715	0.00697788			0.153525		0.120531			0.137028	0.0233298			0.0075187					0.0075187
49.0106	CH4S	Methanethiol			0.000538021											0.00187822				0.0053841					0.00260011	0.00250239			0.174568		0.108251			0.14141	0.0468933			0.0128638					0.0128638
60.0444	C2H5NO	Acetamide6,3
60.0808	C3H9N	Trimethylamine6,15,17			0.0137996											0.00148587				0.00878382					0.00802309	0.006192			0.0419795		0.0348046			0.038392	0.00507344			0.00481116					0.00481116
65.0386	C5H4	1,3-Pentadiyne			0.00169842											0.00142876				0.00392094					0.00234938	0.00136768			0.0137595		0.00646993			0.0101147	0.00515454			0.00745373					0.00745373
71.0855	C5H10	Assorted HCs20			0.00959359											0.00308578				0.00562855					0.00610264	0.00327971			0.0868842		0.0610317			0.073958	0.0182804			0.039914					0.039914
85.1012	C6H12	Assorted HCs20			0.0044085											0.00130854				0.00364317					0.00312007	0.00161483			0.0425549					0.0425549				0.0175905					0.0175905
87.0804	C5H10O	Pentanone20
88.0757	C4H9NO	Assorted Amides6			0.012792											0.00921673				0.0210062					0.0143383	0.00604494			0.0715315		0.108368			0.0899497	0.0260473
89.0233	C3H4O3	Unknown			0.00422213											0.00234172				0.00318515					0.00324967	0.000941863			0.00599451		0.00261327			0.00430389	0.00239089			0.00668382					0.00668382
90.0913	C4H11NO	Assorted Amines6														0.00199844				0.00529226					0.00364535	0.00232908
93.0335	C6H4O	Unknown			0.00364378											0.000681678				0.00324273					0.00252273	0.00160696			0.0219069					0.0219069				0.00279482					0.00279482
95.0855	C7H10	Unknown			0.0138265											0.0112053				0.0220658					0.0156992	0.00566727			0.229703		0.162579			0.196141	0.0474636			0.282646					0.282646
97.0648	C6H8O	2,5-Dimethylfuran19,20			0.0439449											0.0287083				0.0524632					0.0417055	0.0120347			0.418652		0.256051			0.337352	0.114976			0.0953771					0.0953771
97.1012	C7H12	Assorted HCs20			0.0115343											0.00353745				0.00490735					0.0066597	0.00427673			0.113281		0.0685193			0.0908999	0.031651			0.0394932					0.0394932
99.0804	C6H10O	Unknown																																				0.0240742					0.0240742
101.023	C4H4O3	Unknown			0.0183129											0.00895976				0.0191861					0.0154863	0.00566897			0.0130762		0.00724365			0.0101599	0.00412425			0.0201428					0.0201428
103.039	C4H6O3	Methyl pyruvate8			0.0381762											0.0234429				0.046106					0.0359084	0.0115005			0.14814		0.0612635			0.104702	0.061431			0.0624655					0.0624655
103.075	C5H10O2	Unknown														0.00269919				0.0061696					0.0044344	0.00245395			0.0703268		0.0438434			0.0570851	0.0187266			0.016775					0.016775
104.049	C7H5N	Benzonitrile7																																				0.0231146					0.0231146
109.065	C7H8O	Cresols (Methylphenols)2,4,10,13,14,16			0.0387515											0.0299964				0.0407447					0.0364975	0.00571767			0.393353		0.284062			0.338708	0.0772805			0.122636					0.122636
109.101	C8H12	Unknown																																				0.138691					0.138691
111.117	C8H14	Unknown			0.00481346											0.000928463				0.00426003					0.00333398	0.00210154			0.0610793		0.0341531			0.0476162	0.0190397			0.0152374					0.0152374
115.075	C6H10O2	Unknown																													0.0615544			0.0615544
117.055	C5H8O3	Unknown			0.0412921											0.0273544				0.0604673					0.0430379	0.0166253			0.3242		0.138604			0.231402	0.131236			0.0683623					0.0683623
117.091	C6H12O2	Unknown																																				0.0156526					0.0156526
123.117	C9H14	Unknown			0.00631431											0.0031623				0.00583795					0.00510486	0.00169908			0.0974055		0.0576247			0.0775151	0.0281293			0.102383					0.102383
125.023	C6H4O3	Unknown			0.037548											0.0206633				0.0354599					0.0312237	0.00920501			0.036471		0.00169765			0.0190843	0.0245884			0.0365468					0.0365468
127.075	C7H10O2	Unknown			0.0145161																				0.0145161				0.22578		0.103745			0.164762	0.0862918			0.0343254					0.0343254
133.065	C9H8O	Assorted HCs20 inc. Methylbenzofurans														0.00672967				0.00887517					0.00780242	0.0015171
135.044	C8H6O2	Unknown														0.0029238				0.00471322					0.00381851	0.00126531			0.0213373		0.0132501			0.0172937	0.00571849			0.0124522					0.0124522
135.08	C9H10O	Unknown			0.0124309											0.00487792				0.0074687					0.00825916	0.00383801			0.0684935		0.0468859			0.0576897	0.0152788			0.0305131					0.0305131
135.117	C10H14	p-Cymene20														0.0020512				0.00206134					0.00205627	7.17244e-06			0.0591686					0.0591686				0.108162					0.108162
137.06	C8H8O2	Unknown			0.0135361											0.0108817				0.0166975					0.0137051	0.00291158			0.0735275		0.0220459			0.0477867	0.0364029			0.0527833					0.0527833
137.096	C9H12O	Unknown			0.00686762																				0.00686762						0.0997875			0.0997875
139.039	C7H6O3	Unknown			0.0124373											0.00593481				0.0109207					0.00976425	0.00340199			0.0462469		0.0122904			0.0292687	0.0240109			0.0295113					0.0295113
139.075	C8H10O2	Creosol (4-Methylguaiacol)4,8,9,10,14,16			0.026338											0.0184073				0.0347316					0.0264923	0.00816324			0.218013		0.112375			0.165194	0.0746973			0.057438					0.057438
141.055	C7H8O3	3-Methoxycatechol (3-Methoxy-1,2-Benzenediol)10			0.0120706											0.00736649				0.0156568					0.011698	0.00415772			0.0675248		0.0174767			0.0425008	0.0353893			0.0147988					0.0147988
141.091	C8H12O2	Unknown																											0.11144		0.0535087			0.0824744	0.0409637			0.0131478					0.0131478
145.065	C10H8O	Unknown			0.0655087											0.0335548				0.0684196					0.0558277	0.0193437			0.057768		0.032271			0.0450195	0.0180291			0.054206					0.054206
145.101	C11H13	Unknown																											0.0717327		0.0500693			0.060901	0.0153183			0.0359185					0.0359185
147.08	C10H10O	Unknown			0.0105881											0.00748521				0.012413					0.0101621	0.00249135			0.090489		0.0661921			0.0783405	0.0171805			0.0334861					0.0334861
147.117	C11H14	Unknown
149.06	C9H8O2	Unknown			0.0142996											0.00857174				0.0138869					0.0122528	0.00319453			0.0444326					0.0444326				0.0241347					0.0241347
149.096	C10H12O	Unknown
149.132	C11H16	Unknown																											0.131656					0.131656				0.0632184					0.0632184
151.075	C9H10O2	4-Vinylguaiacol (2-Methoxy-6-Vinylphenol)4,8,9,10			0.0328251											0.0230438				0.0429402					0.0329364	0.0099487			0.272017		0.115711			0.193864	0.110525			0.086838					0.086838
151.148	C11H18	Unknown																																				0.043534					0.043534
155.07	C8H10O3	Syringol2,4,8,10,13,14														0.00888781				0.0169591					0.0129235	0.00570726			0.0982109		0.076041			0.087126	0.0156764			0.0203969					0.0203969
165.091	C10H12O2	Eugenol8,10 / Isoeugenol11
References are as follows: 1-Akagi et al., 2013; 2-Azeez et al., 2011; 3-Barnes et al., 2010; 4-Bocchini et al., 1997; 5- Christian et al., 2003; 6-Ge et al., 2011; 7-Hatch et al., 2014;
8-Heigenmoser et al., 2013; 9-Ingemarrsson et al., 1998; 10-Jiang et al., 2010; 11-Jordon and Seen, 2005; 12-Karl et al., 2007; 13-Li et al., 2013; 14-Liu et al., 2012;
15-Lobert et al., 1991; 16-Pittman Jr. et al., 2012; 17-Rehbein et al., 2011; 18-Schade and Crutzen, 1995; 19-Simmleit and Schulten, 1989; 20-Yokelson et al., 2013; 21-Veres et al., 2010
[truncated: 151 more columns]

## Sheet: Table S3
Table S3. Emission factors (g/kg) for common fire-types. Savanna, crop residue, and open cooking were adjusted (see text) to improve representation of real-world biomass burning emissions.
Protonated m/z	Formula	Compound (for isobaric species see Table S4)	EF Savanna grasses (18)a	EF Crop Residue (food fuels) (19)a	EF Peat (6) avg(stdev)	EF Chaparral (8) avg(stdev)	EF Coniferous Canopy (14) avg(stdev)	EF Open Cooking (3)b	EF Rocket cookstoves (5) avg(stdev)	EF Gasifier Cookstove (1)
	MCE		0.938	0.925	0.767(0.074)	0.927(0.017)	0.933(0.032)	0.927	0.972(0.015)	0.984063
	CO2	Carbon dioxide	-	-	1325.1(192.3)	1656.0(50.6)	1656.6(112.0)	-	1607.6(72.6)	1679.94
	CO	Carbon monoxide	-	-	256.1(84.7)	82.7(18.9)	74.2(32.5)	-	29.1(14.2)	17.3131
	CH4	Methane	2.27(1.32)	3.49(2.19)	10.5(5.5)	3.10(1.35)	3.69(2.61)	4.86(0.20)	1.09(0.95)	0.373975
18.0338	NH3	Ammonia	0.689(0.651)	1.10(1.05)	1.78(0.59)	0.992(0.285)	1.20(0.79)	7.88E-2(6.90E-2)	5.71E-2(9.36E-2)	0.0112336
	C2H2	Acetylene	0.250(0.103)	0.331(0.277)	0.153(0.058)	1.16(0.59)	0.887(0.424)	0.602(0.361)	0.402(0.499)	0.157621
28.0182	HCN	Hydrogen Cyanide	0.329(0.081)	0.381(0.259)	3.65(2.14)	0.343(0.208)	0.457(0.344)	0.221(0.005)	4.30E-2	-
	C2H4	Ethene	1.14(0.69)	1.34(0.80)	1.16(0.55)	2.52(1.34)	3.20(2.12)	2.21(1.40)	0.407(0.388)	0.155888
31.0178	HCHO	Formaldehyde	2.52(1.63)	1.93(1.32)	1.58(0.68)	1.66(0.80)	2.53(1.67)	1.70(0.74)	0.435(0.241)	0.206287
	NO	Nitric oxide	2.93(0.65)	1.44(0.42)	1.00(0.59)	1.81(0.49)	1.89(0.76)	0.319(0.089)	0.598(0.271)	0.605835
33.0335	CH3OH	Methanol	1.19(1.00)	1.87(1.53)	2.66(2.24)	0.942(0.375)	2.22(1.90)	2.05(1.63)	0.524(0.300)	0.0870611
	HCl	Hydrocholoric acid	0.236(0.054)	0.472(0.320)	7.45E-03	0.028	0.071(0.040)	-	-	-
43.0542	C3H6	Propene	0.347(0.104)	0.576(0.415)	1.21(0.63)	0.571(0.282)	0.956(0.551)	0.317(0.145)	1.18E-2	0.00598432
47.0128	HCOOH	Formic acid	0.335(0.224)	0.633(0.846)	0.452(0.165)	0.192(0.082)	0.646(0.513)	0.620(0.533)	0.145(0.074)	0.0499897
	NO2	Nitrogen dioxide	1.99(0.36)	1.65(0.47)	1.79(0.76)	0.874(0.546)	2.18(0.67)	1.11(0.28)	1.23(0.30)	1.65666
	HONO	Nitrous acid	0.360(0.069)	0.395(0.221)	0.493(0.450)	0.783(0.268)	0.679(0.277)	0.291(0.169)	0.660	-
61.0284	CH3COOH	Acetic Acid	3.96(2.57)	3.88(3.64)	5.83(5.11)	1.63(0.67)	3.69(3.46)	8.90(9.27)	1.85(0.92)	0.0758918
	C2H4O2	Glycolaldehyde	0.181(0.199)	2.29(3.04)	-	0.136(0.058)	0.660(0.589)	0.455(0.149)	0.145(0.053)	0.260525
	SO2	Sulfur dioxide	1.75(0.52)	1.06(0.36)	4.26	0.550(0.243)	0.983(0.235)	0.498879	-	-
69.0335	C4H4O	Furan	0.392(0.277)	0.355(0.445)	1.40(1.17)	0.168(0.098)	0.276(0.275)	0.228(0.162)	5.41E-2(4.45E-2)	0.0180301
41.0386	C3H4	Propyne1	-	0.340(0.250)	-	0.344(0.055)	0.716(0.252)	-	-	-
42.0338	C2H3N	Acetonitirile	0.152(0.138)	0.225(0.173)	0.601(0.258)	8.65E-2(3.26E-2)	0.132(0.111)	2.05E-2(4.63E-3)	6.45E-03(1.16E-02)	0.00062878
43.0178	C2H2O	Ketene Fragments	1.87(1.89)	2.29(2.51)	1.42(1.09)	0.741(0.389)	1.42(1.17)	1.33(1.35)	0.405(0.257)	0.0954104
45.0335	C2H4O	Acetaldehyde	2.38(2.26)	2.68(2.42)	1.63(0.67)	0.957(0.452)	1.87(1.31)	0.792(0.439)	0.255(0.191)	0.130369
51.0229	C4H2	1,3-Butadiyne	1.69E-3(1.43E-3)	3.63E-3(4.51E-3)	2.65E-03(1.45E-03)	4.74E-03(2.80E-03)	3.49E-03(2.02E-03)	1.64E-2(1.24E-2)	1.62E-03(1.68E-03)	0.000663458
53.0386	C4H4	Butenyne	5.08E-2(4.98E-2)	5.59E-2(5.55E-2)	2.86E-02(1.40E-02)	4.87E-2(1.92E-2)	6.18E-02(4.80E-02)	7.99E-2(4.56E-2)	9.40E-03(7.91E-03)	0.00396183
55.0178	C3H2O	2-Propynal	6.88E-2(6.34E-2)	4.22E-2(3.20E-2)	0.096	2.60E-2(1.17E-2)	6.31E-02(4.34E-02)	-	-	-
55.0542	C4H6	1,3-Butadiene	0.141(0.127)	0.191(0.156)	0.260(0.149)	0.205(0.078)	0.330(0.264)	3.37E-2(9.67E-3)	2.82E-2(1.51E-2)	0.00952824
57.0335	C3H4O	Acrolein	0.865(0.806)	0.875(0.764)	0.273(0.128)	0.456(0.193)	0.739(0.554)	0.343(0.133)	0.109(0.087)	0.0395236
57.0699	C4H8	1-Butene	0.106(0.082)	0.134(0.100)	0.744(0.486)	0.167(0.096)	0.346(0.309)	0.245(0.148)	2.98E-2(1.12E-2)	0.0385471
59.0491	C3H6O	Acetone	0.579(0.477)	0.884(0.611)	1.12(0.54)	0.302(0.137)	0.686(0.578)	-	0.131(0.139)	0.0531081
63.0263	C2H6S	Dimethyl Sulfide1	2.53E-2(1.77E-2)	6.80E-2(2.64E-2)	0.0879776	1.47E-2(6.19E-3)	2.64E-02(8.55E-03)	-	-	-
67.0542	C5H6	1,3-Cyclopentadiene	5.22E-2(4.50E-2)	8.29E-2(7.14E-2)	5.74E-02(2.50E-02)	0.102(0.036)	0.190(0.164)	0.126(0.096)	1.27E-2(1.45E-2)	0.00567258
68.9971	C3O2	Carbon suboxide	-	4.64E-3(2.78E-3)	-	-	2.78E-03	-	8.95E-04(5.89E-04)	0.000386987
69.0699	C5H8	Isoprene	0.154(0.111)	0.220(0.170)	0.983(0.726)	0.536(0.234)	1.03(0.97)	0.145(0.077)	2.62E-2(1.38E-2)	0.0193679
71.0491	C4H6O	Methyl Vinyl Ketone, Crotonaldehyde, Methacrolein (~50, 30, 20%)	0.570(0.550)	0.607(0.515)	0.301(0.149)	0.233(0.099)	0.429(0.349)	0.213(0.112)	7.06E-2(5.74E-2)	0.0206716
73.0284	C3H4O2	Methylglyoxal2	0.642(0.596)	0.554(0.582)	0.229(0.113)	0.148(0.064)	0.332(0.262)	0.177(0.104)	5.65E-2(2.94E-2)	0.0279593
73.0648	C4H8O	Methyl Ethyl Ketone	0.140(0.129)	0.290(0.243)	0.540(0.383)	0.066(0.026)	0.145(0.132)	8.04E-2(4.98E-2)	4.10E-2(5.43E-2)	0.00588162
75.0441	C3H6O2	Hydroxyacetone5,8	0.856(1.029)	1.69(2.03)	0.417(0.285)	0.191(0.073)	0.563(0.600)	0.480(0.367)	0.184(0.131)	0.0384102
79.0542	C6H6	Benzene	0.235(0.161)	0.301(0.177)	0.779(0.376)	0.795(0.359)	0.946(0.800)	2.58(2.68)	0.110(0.138)	0.0801422
81.0335	C5H4O	2,4-Cyclopentadiene-1-one	0.204(0.205)	0.303(0.280)	8.89E-02(3.36E-02)	0.103(0.024)	0.231(0.216)	0.159(0.121)	5.84E-2(4.56E-2)	0.008783
83.0491	C5H6O	2-Methylfuran9,19,20	0.418(0.402)	0.532(0.492)	0.500(0.276)	0.139(0.051)	0.323(0.290)	0.221(0.138)	7.25E-2(5.50E-2)	0.0118633
83.0855	C6H10	Assorted HCs20	2.82E-2(2.30E-2)	3.57E-2(2.71E-2)	0.123(0.088)	4.49E-2(2.77E-2)	8.81E-02(7.02E-02)	2.22E-2(5.78E-3)	6.78E-03(2.48E-03)	0.00211232
85.0284	C4H4O2	2-Furanone2,8,14,16	0.839(0.839)	0.820(0.858)	0.583(0.322)	0.199(0.054)	0.545(0.493)	0.208(0.169)	8.23E-2(5.67E-2)	0.0285239
85.0648	C5H8O	Pentenone20	0.153(0.146)	0.186(0.157)	0.153(0.050)	7.26E-2(1.93E-2)	0.167(0.143)	9.02E-2(5.18E-2)	2.99E-2(2.38E-2)	0.00382182
87.0441	C4H6O2	2,3-Butanedione12	0.651(0.643)	1.15(1.21)	0.324(0.135)	0.219(0.059)	0.477(0.428)	0.41(0.30)	0.140(0.096)	0.0250489
89.0597	C4H8O2	Ethyl acetate14	0.110(0.113)	0.233(0.276)	0.117(0.059)	3.79E-2(6.94E-3)	7.72E-02(7.70E-02)	8.72E-2(8.50E-2)	3.08E-2(2.45E-2)	0.00323617
91.0542	C7H6	Unknown	1.98E-2(1.72E-2)	3.28E-2(3.51E-2)	5.94E-02(3.72E-02)	3.46E-2(1.14E-2)	5.39E-02(3.81E-02)	3.73E-2(3.12E-2)	3.27E-03(1.89E-03)	0.00174988
93.0699	C7H8	Toluene	0.174(0.141)	0.296(0.228)	0.520(0.316)	0.416(0.172)	2.42(1.92)	0.290(0.311)	8.61E-2(9.79E-2)	0.0223594
95.0491	C6H6O	Phenol	0.273(0.242)	0.494(0.480)	0.512(0.242)	0.322(0.120)	0.566(0.514)	0.264(0.085)	6.35E-2(1.05E-1)	0.0188927
97.0284	C5H4O2	2-Furaldehyde (furfural)2,8,9,13,14,19	1.58(1.52)	1.03(0.86)	2.08(0.70)	0.316(0.086)	0.713(0.635)	0.926(1.037)	0.219(0.161)	0.0319858
99.0441	C5H6O2	2-Furan Methanol (furfuryl alcohol)13,14,16	0.864(0.914)	1.02(1.15)	0.394(0.222)	0.212(0.060)	0.512(0.466)	0.289(0.238)	0.0312236	-
101.06	C5H8O2	Unknown	0.199(0.204)	0.295(0.322)	0.154(0.054)	6.65E-2(1.37E-2)	0.156(0.144)	0.157(0.154)	5.11E-2(3.67E-2)	0.00578286
103.054	C8H6	Ethynyl Benzene (phenylacetylene)	-	0.254(0.257)	-	6.23E-2(5.95E-3)	0.230	0.236(0.107)	-	-
105.07	C8H8	Styrene	3.04E-2(2.43E-2)	5.63E-2(4.91E-2)	8.25E-02(5.06E-02)	9.07E-2(3.84E-2)	0.152(0.151)	0.234(0.306)	1.03E-2(1.16E-2)	0.00451582
107.049	C7H6O	Benzaldehyde20	4.92E-2(3.92E-2)	7.02E-2(5.19E-2)	5.65E-02(2.52E-02)	8.73E-2(3.57E-2)	0.120(0.088)	0.114(0.102)	1.13E-2(1.49E-2)	0.00499224
107.086	C8H10	p-Xylene	4.73E-2(3.71E-2)	0.107(0.088)	0.366(0.257)	0.114(0.045)	0.285(0.255)	0.265(0.380)	1.56E-2(1.90E-2)	0.00526996
109.028	C6H4O2	Unknown	2.33E-3(1.16E-3)	6.98E-2(5.67E-2)	-	0.576(0.322)	0.184(0.080)	-	-	-
111.044	C6H6O2	Catechol (Benzenediols)8,10,13,16,19,21; Methylfurfural11,14,16,19	0.464(0.465)	0.548(0.559)	0.782(0.411)	0.495(0.292)	0.545(0.495)	0.187(0.129)	5.39E-2(3.38E-2)	0.0109011
111.08	C7H10O	Unknown	0.106(0.091)	0.177(0.167)	0.141(0.079)	2.75E-2(9.99E-3)	0.109(0.102)	4.12E-2(2.36E-2)	2.60E-2(3.34E-2)	0.00151193
113.023	C5H4O3	Unknown	0.209(0.202)	0.166(0.269)	0.220(0.091)	5.65E-2(1.85E-2)	0.137(0.126)	3.29E-2(2.44E-2)	1.22E-2(7.87E-3)	0.00552632
113.06	C6H8O2	2-Hydroxy-3-Methyl-2-Cyclopentenone8,14	0.305(0.371)	0.557(0.693)	0.206(0.099)	9.03E-2(2.04E-2)	0.295(0.292)	0.148(0.110)	4.84E-2(3.31E-2)	0.00575
115.039	C5H6O3	Unknown	0.769(1.159)	0.523(0.682)	0.298(0.235)	0.105(0.030)	0.275(0.275)	0.120(0.136)	3.30E-2(2.75E-2)	0.0183735
117.07	C9H8	Unknown	2.44E-2(1.67E-2)	0.118(0.090)	0.041(0.008)	-	0.268	0.386(0.265)	1.98E-2
119.049	C8H6O	Benzofuran20	2.99E-2(2.55E-2)	4.35E-2(3.62E-2)	3.19E-02(1.02E-02)	3.16E-2(1.28E-2)	4.34E-02(3.27E-02)	4.58E-2(2.57E-2)	4.90E-03(7.34E-03)	0.00215813
119.086	C9H10	Assorted HCs20	1.47E-2(1.17E-2)	3.09E-2(2.70E-2)	0.067(0.054)	4.32E-2(1.54E-2)	9.47E-02(9.50E-02)	9.82E-2(1.43E-1)	4.57E-03(4.94E-03)	0.00194603
121.065	C8H8O	Vinylphenol4	0.254(0.245)	0.574(0.832)	0.107(0.041)	0.123(0.058)	0.211(0.174)	6.62E-2(4.25E-2)	3.89E-2(7.87E-2)	0.00327465
121.101	C9H12	Trimethylbenzene; Assorted HCs20	4.19E-2(3.60E-2)	6.58E-2(6.11E-2)	0.229(0.164)	3.98E-2(9.29E-3)	0.168(0.160)	7.01E-2(9.27E-2)	1.12E-2(1.69E-2)	0.00324402
123.044	C7H6O2	Salicylaldehyde7,11	6.59E-2(5.66E-2)	0.106(0.109)	0.142(0.133)	5.89E-2(2.81E-2)	0.120(0.099)	4.92E-2(2.66E-3)	1.34E-2(1.59E-2)	0.00540063
123.08	C8H10O	Xylenol (2,5-Dimethyl phenol)7,13	0.133(0.126)	0.275(0.336)	0.201(0.105)	3.97E-2(1.42E-2)	0.112(0.092)	5.67E-2(2.17E-2)	3.33E-2(5.76E-2)	0.00277881
125.06	C7H8O2	Guaiacol (2-Methoxyphenol)2,4,8,10,13,14,16	0.291(0.330)	0.578(0.701)	0.471(0.381)	7.75E-2(2.76E-2)	0.323(0.307)	0.150(0.101)	5.17E-2(4.01E-2)	0.00760529
127.039	C6H6O3	Hydroxymethylfurfural8,13,14	0.361(0.427)	0.296(0.332)	0.360(0.182)	8.51E-2(3.75E-2)	0.331(0.288)	7.45E-2(5.31E-2)	2.19E-2(1.15E-2)	0.0100288
129.07	C10H8	Naphthalene20	0.136(0.151)	0.164(0.245)	0.194(0.043)	0.138(0.048)	0.183(0.125)	1.04(1.26)	3.47E-2(1.76E-2)	0.0152537
131.086	C10H10	Assorted HCs20 inc. Dihydronaphthalene	4.14E-2(4.66E-2)	4.01E-2(3.53E-2)	7.55E-02(7.70E-02)	2.41E-2(1.39E-2)	4.63E-02(3.43E-02)	9.90E-2(1.23E-1)	-	-
137.132	C10H16	Terpenes (α-Pinene)	3.11E-2(2.43E-2)	6.35E-2(5.12E-2)	0.159(0.091)	7.55E-2(3.28E-2)	0.163(0.143)	0.197(0.257)	8.64E-03(1.23E-02)	0.00446121
143.086	C11H10	Methyl-Naphthalenes7	-	8.80E-2(8.59E-2)	-	5.31E-2(1.37E-2)	0.112(0.043)	-	-	-
Protonated m/z	Formula	Compound	EF Savanna grasses (3)a	EF Crop Residue (6) (food fuels)a	EF Peat (4) avg(stdev)	EF Chaparral (2) avg(stdev)	EF Coniferous Canopy (3) avg(stdev)	EF Open Cooking Fires (1)b	EF Rocket cookstoves (2) avg(stdev)	EF Gasifier Cookstove (0)
46.0651	C2H7N	Dimethylamine6,15,18; Ethylamine6,15,18	1.51E-2(6.98E-3)	8.44E-2(9.04E-2)	-	1.39E-2(5.83E-3)	2.79E-02(3.55E-02)	0.050681	5.77E-3(6.25E-3)	-
49.0106	CH4S	Methanethiol	1.71E-2(1.65E-2)	3.84E-2(3.82E-2)	2.84E-2(4.88E-2)	9.29E-3(9.32E-3)	1.80E-02(1.91E-02)	0.0100261	1.51E-3(3.54E-4)	-
60.0444	C2H5NO	Acetamide6,3	-	-	2.87(1.52)	-	-	0.041067	0.0106753	-
60.0808	C3H9N	Trimethylamine6,15,17	4.41E-2(3.41E-2)	7.85E-2(1.10E-1)	-	2.99E-3(1.07E-3)	5.09E-03(4.74E-03)	-	-	-
65.0386	C5H4	1,3-Pentadiyne	1.32E-2(7.66E-3)	1.29E-2(1.35E-2)	0.126(0.097)	6.89E-3(4.64E-3)	7.96E-03(7.15E-03)	-	-	-
71.0855	C5H10	Assorted HCs20	1.95E-2(1.05E-2)	3.27E-2(2.16E-2)	0.364(0.190)	2.23E-2(4.12E-3)	5.69E-02(5.43E-02)	0.0232662	3.87E-3(5.45E-3)	-
85.1012	C6H12	Assorted HCs20	1.43E-2(7.42E-3)	1.30E-2(6.86E-3)	0.468(0.296)	0.00502947	3.69E-02(2.72E-02)	0.00432829	0.00282035	-
87.0804	C5H10O	Pentanone20	-	-	7.49E-2(8.50E-2)	-	-	-	-	-
88.0757	C4H9NO	Assorted Amides6	6.64E-2(2.80E-2)	0.116(0.143)	3.80E-2(6.42E-2)	0.0105564	3.42E-02(4.15E-02)	0.0845591	1.15E-2(5.85E-3)	-
89.0233	C3H4O3	Unknown	7.60E-3(2.20E-3)	1.57E-2(2.52E-2)	0.106(0.083)	1.59E-3(4.37E-4)	9.40E-03(1.08E-02)	0.00147856	0.00142266	-
90.0913	C4H11NO	Assorted Amines6	3.65E-3(2.33E-3)	3.94E-2(3.25E-2)	-	-	-	-	-	-
93.0335	C6H4O	Unknown	1.47E-2(9.34E-3)	8.50E-3(5.01E-3)	0.312(0.285)	0.00808101	6.48E-03(5.22E-03)	0.0708535	0.00458121	-
95.0855	C7H10	Unknown	6.34E-2(2.29E-2)	0.741(1.039)	2.94(1.92)	0.100(0.088)	0.249(0.186)	0.0482655	4.98E-3(2.35E-3)	-
97.0648	C6H8O	2,5-Dimethylfuran19,20	0.150(0.043)	9.81E-2(1.64E-1)	0.139(0.009)	7.95E-2(7.02E-2)	0.122(0.118)	-	-	-
97.1012	C7H12	Assorted HCs20	1.56E-2(1.00E-2)	0.842(1.292)	0.238(0.093)	2.67E-2(2.43E-2)	5.40E-02(5.52E-02)	0.130574	1.31E-2(1.75E-2)	-
99.0804	C6H10O	Unknown	-	-	0.113(0.039)	0.0281777	0.0240742	-	-	-
101.023	C4H4O3	Unknown	6.30E-2(2.31E-2)	0.168(0.254)	0.162(0.058)	1.50E-2(1.48E-2)	5.06E-02(6.94E-02)	0.0240809	5.28E-3(5.66E-3)	-
103.039	C4H6O3	Methyl pyruvate8	0.139(0.044)	7.08E-2(6.55E-2)	0.119(0.113)	4.25E-2(2.81E-2)	9.23E-02(1.00E-01)	0.216554	2.63E-2(1.66E-2)	-
103.075	C5H10O2	Unknown	4.43E-3(2.45E-3)	2.16E-2(1.72E-2)	0.168(0.079)	1.80E-2(1.14E-2)	2.41E-02(2.18E-02)	-	-	-
104.049	C7H5N	Benzonitrile7	-	-	-	0.0341469	0.0231146	-	-	-
109.065	C7H8O	Cresols (Methoxyphenols)2,4,10,13,14,16	8.60E-2(1.35E-2)	0.249(0.201)	0.167(0.149)	1.19E-1(1.12E-1)	0.144(0.123)	0.125211	6.85E-3(7.37E-3)	-
109.101	C8H12	Unknown	-	-	0.913(0.588)	0.0593596	0.138691	0.0203882	4.66E-3(1.18E-3)	-
111.117	C8H14	Unknown	1.91E-2(1.21E-2)	7.95E-3(3.47E-3)	0.371(0.152)	0.00527557	2.19E-02(1.98E-02)	0.00769858	-	-
115.075	C6H10O2	Unknown	-	-	-	0.00963865	0.00469616	-	-	-
117.055	C5H8O3	Unknown	0.191(0.074)	0.414(0.529)	3.99E-2(9.70E-3)	5.68E-2(3.13E-2)	0.125(0.141)	0.302137	2.99E-2(3.02E-2)	-
117.091	C6H12O2	Unknown	-	-	7.63E-2(2.76E-2)	0.0276525	0.0156526	0.0265272	0.00385558	-
123.117	C9H14	Unknown	1.78E-2(5.93E-3)	1.81E-2(1.33E-2)	0.145(0.114)	3.69E-2(4.03E-2)	8.43E-02(6.35E-02)	0.0200552	0.00249659	-
125.023	C6H4O3	Unknown	0.101(0.030)	0.186(0.214)	0.131(0.043)	3.19E-2(3.80E-2)	7.74E-02(1.01E-01)	0.0986184	1.08E-2(8.56E-3)	-
127.075	C7H10O2	Unknown	1.45E-2(0.00E0)	0.126(0.135)	-	3.24E-2(3.51E-2)	5.02E-02(5.48E-02)	0.0703807	6.60E-3(6.33E-3)	-
133.065	C9H8O	Assorted HCs20 inc. Methylbenzofurans	7.80E-3(1.52E-3)	-	-	-	-	-	-	-
135.044	C8H6O2	Unknown	3.82E-3(1.27E-3)	4.18E-2(4.66E-2)	2.70E-2(1.55E-2)	1.29E-2(1.11E-2)	1.55E-02(1.48E-02)	0.0168443	1.14E-3(2.60E-4)	-
135.08	C9H10O	Unknown	2.23E-2(1.04E-2)	5.21E-2(4.73E-2)	6.06E-2(3.91E-2)	1.60E-2(1.34E-2)	4.19E-02(3.96E-02)	0.0265809	2.99E-3(1.73E-3)	-
135.117	C10H14	p-Cymene20	2.06E-3(7.17E-6)	1.72E-2(1.44E-2)	0.191(0.126)	0.0487162	0.140(0.045)	0.00663756	-	-
137.06	C8H8O2	Unknown	3.97E-2(8.44E-3)	0.159(0.206)	8.94E-2(4.69E-2)	2.68E-2(3.10E-2)	5.15E-02(4.25E-02)	0.0701996	5.27E-3(4.42E-3)	-
137.096	C9H12O	Unknown	6.87E-3(0.00E0)	-	9.10E-2(5.48E-2)	0.0136208	0.00831065	-	-	-
139.039	C7H6O3	Unknown	3.37E-2(1.17E-2)	0.113(0.148)	0.235(0.210)	1.29E-2(1.23E-2)	4.53E-02(5.16E-02)	0.0557027	4.36E-3(2.63E-3)	-
139.075	C8H10O2	Creosol (4-Methylguaiacol)4,8,9,10,14,16	9.97E-2(3.07E-2)	0.138(0.151)	0.216051	2.29E-2(1.70E-2)	9.52E-02(1.11E-01)	0.126465	1.47E-2(1.08E-2)	-
141.055	C7H8O3	3-Methoxycatechol (3-Methoxy-1,2-Benzenediol)10	4.91E-2(1.75E-2)	5.73E-2(7.55E-2)	0.125(0.072)	1.02E-2(6.60E-3)	3.15E-02(3.92E-02)	0.0790163	0.012895	-
141.091	C8H12O2	Unknown	-	3.80E-2(4.00E-2)	-	9.87E-3(8.08E-3)	1.67E-02(1.66E-02)	-	-	-
145.065	C10H8O	Unknown	0.218(0.076)	0.131(0.185)	0.322(0.060)	3.91E-2(4.16E-2)	0.106(0.132)	0.0612357	4.56E-3(4.06E-3)	-
145.101	C11H13	Unknown	-	8.08E-3(3.86E-3)	0.191(0.129)	3.44E-2(3.43E-2)	5.01E-02(4.98E-02)	-	-	-
147.08	C10H10O	Unknown	3.25E-2(7.97E-3)	6.42E-2(5.70E-2)	9.10E-2(4.79E-2)	2.64E-2(1.88E-2)	4.44E-02(4.10E-02)	0.0344459	3.60E-3(2.85E-3)	-
147.117	C11H14	Unknown	-	-	0.108(0.088)	-	-	-	-	-
149.06	C9H8O2	Unknown	3.73E-2(9.72E-3)	7.06E-2(6.58E-2)	0.107(0.050)	0.0313631	4.05E-02(2.31E-02)	-	-	-
149.096	C10H12O	Unknown	-	-	-	-	-	-	-	-
149.132	C11H16	Unknown	-	-	0.173(0.127)	0.0470916	0.167(0.147)	-	-	-
151.075	C9H10O2	4-Vinylguaiacol (2-Methoxy-6-Vinylphenol)4,8,9,10	0.122(0.037)	0.306(0.358)	0.172(0.118)	2.10E-2(1.19E-2)	0.134(0.152)	0.103578	9.41E-3(8.69E-3)	-
151.148	C11H18	Unknown	-	-	-	0.0323768	0.043534	-	-	-
155.07	C8H10O3	Syringol2,4,8,10,13,14	1.29E-2(5.71E-3)	0.121(0.134)	0.175(0.138)	4.77E-2(3.09E-2)	2.58E-02(2.03E-02)	0.292313	2.55E-2(2.27E-2)	-
165.091	C10H12O2	Eugenol8,10 / Isoeugenol11	-	-	-	-	-	0.139022	9.00E-3(7.38E-3)	-
Note: values in parenthesis following fuel-type indicate the number of fires included in average shown or number included in adjustment procedure
a-Laboratory EF adjusted using the MCE plot based approach described in Stockwell et al. (2014)
b-The EF of smoldering NMOCs adjusted based on their ratio to CH4 and the flaming compounds adjusted based on their ratio to CO2
Note: For the adjusted fuel types, the standard deviation was scaled by the same factor applied to the mean
References are as follows: 1-Akagi et al., 2013; 2-Azeez et al., 2011; 3-Barnes et al., 2010; 4-Bocchini et al., 1997; 5- Christian et al., 2003; 6-Ge et al., 2011; 7-Hatch et al., 2014;
8-Heigenmoser et al., 2013; 9-Ingemarrsson et al., 1998; 10-Jiang et al., 2010; 11-Jordon and Seen, 2005; 12-Karl et al., 2007; 13-Li et al., 2013; 14-Liu et al., 2012;
15-Lobert et al., 1991; 16-Pittman Jr. et al., 2012; 17-Rehbein et al., 2011; 18-Schade and Crutzen, 1995; 19-Simmleit and Schulten, 1989; 20-Yokelson et al., 2013; 21-Veres et al., 2010

## Sheet: Table S4
Table S4. Molecular formulas and likely identies of masses detected by full PTR-TOF-MS scans
Assignment	Protonated m/z	Formula	Compound	Secondary compounds / Alternative assignments
Confirmed	18.0338	NH3	Ammonia
Confirmed	28.0182	HCN	Hydrogen Cyanide
Confirmed	31.0178	HCHO	Formaldehyde
Confirmed	33.0335	CH3OH	Methanol
Confirmed	41.0386	C3H4	Propyne1
Confirmed	42.0338	C2H3N	Acetonitirile
Confirmed	43.0178	C2H2O	Ketene Fragments
Confirmed	43.0542	C3H6	Propene
Tentative	44.0495	C2H5N	Ethenamine6
Confirmed	45.0335	C2H4O	Acetaldehyde
Tentative	46.0651	C2H7N	Dimethylamine6,15,18; Ethylamine6,15,18
Confirmed	47.0128	HCOOH	Formic acid
Tentative	49.0106	CH4S	Methanethiol
Confirmed	51.0229	C4H2	1,3-Butadiyne
Confirmed	53.0386	C4H4	Butenyne
Confirmed	54.0338	C3H3N	Acrylonitirile1,12
Tentative	55.0178	C3H2O	2-Propynal	Propadienal; Cyclopropenone
Confirmed	55.0542	C4H6	1,3-Butadiene	(~10%) : 1,2-Butadiene; 1-Butyne; 2-Butyne
Confirmed	56.0495	C3H5N	Propanenitrile12
Confirmed	57.0335	C3H4O	Acrolein
Confirmed	57.0699	C4H8	1-Butene	2-Methylpropene; trans-Butene; cis-Butene
Confirmed	59.0491	C3H6O	Acetone	Propanal (~10%)
Tentative	60.0444	C2H5NO	Acetamide6,3
Tentative	60.0808	C3H9N	Trimethylamine6,15,17	Propanamine6
Confirmed	61.0284	C2H4O2	Acetic Acid	Glycolaldehyde (10-50%); Methylformate
Confirmed	63.0263	C2H6S	Dimethyl Sulfide1
Tentative	65.0386	C5H4	1,3-Pentadiyne
Confirmed	67.0542	C5H6	1,3-Cyclopentadiene	Pentenyne isomers
Confirmed	68.0495	C4H5N	Pyrrole7,12	Minor contribution from nitriles: Methacrylonitrile; 2 & 3-Butenenitrile
Confirmed	68.9971	C3O2	Carbon suboxide
Confirmed	69.0335	C4H4O	Furan
Confirmed	69.0699	C5H8	Isoprene	(~10-20%) : Cyclopentene; trans-1,3-Pentadiene; cis-1,3-Pentadiene
Confirmed	71.0491	C4H6O	Methyl Vinyl Ketone, Crotonaldehyde, Methacrolein (~50, 30, 20%)
Confirmed	71.0855	C5H10	Assorted HCs20
Tentative	73.0284	C3H4O2	Methylglyoxal2
Confirmed	73.0648	C4H8O	Methyl Ethyl Ketone	(~25%) : 2-Methylpropanal; n-Butanal; Tetrahydrofuran
Confirmed	75.0441	C3H6O2	Hydroxyacetone5,8	Methyl acetate; Ethyl formate
Confirmed	79.0542	C6H6	Benzene
Confirmed	80.0495	C5H5N	Pyridine7,12,14,20
Tentative	81.0335	C5H4O	2,4-Cyclopentadiene-1-one
Confirmed	82.0651	C5H7N	Methylpyrroles7	Minor contribution from nitriles: 2-Methylene-Butanenitrile; 3-Methyl-3-Butenenitrile7
Confirmed	83.0491	C5H6O	2-Methylfuran9,19,20	3-Methylfuran; Cyclopentenone2
Confirmed	83.0855	C6H10	Assorted HCs20
Tentative	85.0284	C4H4O2	2-Furanone2,8,14,16
Confirmed	85.0648	C5H8O	Pentenone20	Cyclopentanone; 2-Methyl-2-Butenal
Confirmed	85.1012	C6H12	Assorted HCs20
Confirmed	87.0441	C4H6O2	2,3-Butanedione12	(20-50%) Methyl Acrylate; Vinyl acetate; 2,3-Dihydro-1,4-Dioxin
Confirmed	87.0804	C5H10O	Pentanone20	2-Methylbutanal; 3-Methyl-2-Butanone; Pentanal
Tentative	88.0757	C4H9NO	Assorted Amides6	Dimethylacetamide; N-ethylacetamide, 2-methylpropanamide, Butanamide; Morpholine
Unknown	89.0233	C3H4O3	Unknown
Tentative	89.0597	C4H8O2	Ethyl acetate14	1-Hydroxy-2-Butanone14; Butyric acid9,14; Methyl Propanoate20
Tentative	90.0913	C4H11NO	Assorted Amines6	Dimethylethanolamine6
Unknown	91.0542	C7H6	Unknown
Unknown	93.0335	C6H4O	Unknown
Confirmed	93.0699	C7H8	Toluene	(<5%) Heptadiyne isomer
Confirmed	95.0491	C6H6O	Phenol
Unknown	95.0855	C7H10	Unknown
Confirmed	97.0284	C5H4O2	2-Furaldehyde (furfural)2,8,9,13,14,19	3-Furaldehyde; Cyclopentenedione20
Confirmed	97.0648	C6H8O	2,5-Dimethylfuran19,20	2-Ethylfuran20; 2-Methylcyclopentenone13,14,16
Confirmed	97.1012	C7H12	Assorted HCs20
Tentative	99.0441	C5H6O2	2-Furan Methanol (furfuryl alcohol)13,14,16	Methyl Furanone19; Hydroxy-Cyclopentenone2,8
Unknown	99.0804	C6H10O	Unknown
Unknown	101.023	C4H4O3	Unknown
Unknown	101.06	C5H8O2	Unknown	Methyl Methacrylate20; 2,3-Pentanedione19
Tentative	103.039	C4H6O3	Methyl pyruvate8	Hydroxyoxobutanal19
Confirmed	103.054	C8H6	Ethynyl Benzene (phenylacetylene)
Unknown	103.075	C5H10O2	Unknown
Tentative	104.049	C7H5N	Benzonitrile7
Confirmed	105.07	C8H8	Styrene
Confirmed	107.049	C7H6O	Benzaldehyde20
Confirmed	107.086	C8H10	Xylenes	Ethylbenzene (~20%)
Unknown	109.028	C6H4O2	Unknown
Tentative	109.065	C7H8O	Cresols (Methylphenols)2,4,10,13,14,16
Unknown	109.101	C8H12	Unknown
Tentative	111.044	C6H6O2	Catechol (Benzenediols)8,10,13,16,19,21; Methylfurfural11,14,16,19
Unknown	111.08	C7H10O	Unknown
Unknown	111.117	C8H14	Unknown
Unknown	113.023	C5H4O3	Unknown
Tentative	113.06	C6H8O2	2-Hydroxy-3-Methyl-2-Cyclopentenone8,14
Unknown	115.039	C5H6O3	Unknown
Unknown	115.075	C6H10O2	Unknown
Unknown	117.055	C5H8O3	Unknown
Unknown	117.07	C9H8	Unknown
Unknown	117.091	C6H12O2	Unknown
Confirmed	119.049	C8H6O	Benzofuran20
Confirmed	119.086	C9H10	Assorted HCs20
Tentative	121.065	C8H8O	Vinylphenol4	3-Methylbenzaldehyde7; Acetophenone7; Benzenacetaldehyde7
Confirmed	121.101	C9H12	Trimethylbenzene; Assorted HCs20
Tentative	123.044	C7H6O2	Salicylaldehyde7,11
Tentative	123.08	C8H10O	Xylenol (2,5-Dimethyl phenol)7,13	4-Ethylphenol4,14
Unknown	123.117	C9H14	Unknown
Unknown	125.023	C6H4O3	Unknown
Tentative	125.06	C7H8O2	Guaiacol (2-Methoxyphenol)2,4,8,10,13,14,16
Tentative	127.039	C6H6O3	Hydroxymethylfurfural8,13,14	2-Hydroxy-3-Ethyl-2-Cyclopentenone14
Unknown	127.075	C7H10O2	Unknown
Confirmed	129.07	C10H8	Naphthalene20
Tentative	131.086	C10H10	Assorted HCs20 inc. Dihydronaphthalene
Tentative	133.065	C9H8O	Assorted HCs20 inc. Methylbenzofurans
Unknown	135.044	C8H6O2	Unknown
Unknown	135.08	C9H10O	Unknown
Confirmed	135.117	C10H14	p-Cymene20	Assorted HCs20
Unknown	137.06	C8H8O2	Unknown
Unknown	137.096	C9H12O	Unknown
Confirmed	137.132	C10H16	Terpenes (α-Pinene)
Unknown	139.039	C7H6O3	Unknown
Tentative	139.075	C8H10O2	Creosol (4-Methylguaiacol)4,8,9,10,14,16
Tentative	141.055	C7H8O3	3-Methoxycatechol (3-Methoxy-1,2-Benzenediol)10
Unknown	141.091	C8H12O2	Unknown
Tentative	143.086	C11H10	Methyl-Naphthalenes7
Unknown	145.065	C10H8O	Unknown
Unknown	145.101	C11H13	Unknown
Unknown	147.08	C10H10O	Unknown
Unknown	147.117	C11H14	Unknown
Unknown	149.06	C9H8O2	Unknown
Unknown	149.096	C10H12O	Unknown
Unknown	149.132	C11H16	Unknown
Tentative	151.075	C9H10O2	4-Vinylguaiacol (2-Methoxy-6-Vinylphenol)4,8,9,10
Unknown	151.148	C11H18	Unknown
Unknown	153.07	C12H8	Unknown
Tentative	155.07	C8H10O3	Syringol2,4,8,10,13,14
Tentative	165.091	C10H12O2	Eugenol8,10 / Isoeugenol11
References are as follows: 1-Akagi et al., 2013; 2-Azeez et al., 2011; 3-Barnes et al., 2010; 4-Bocchini et al., 1997; 5- Christian et al., 2003; 6-Ge et al., 2011; 7-Hatch et al., 2014;
8-Heigenmoser et al., 2013; 9-Ingemarrsson et al., 1998; 10-Jiang et al., 2010; 11-Jordon and Seen, 2005; 12-Karl et al., 2007; 13-Li et al., 2013; 14-Liu et al., 2012;
15-Lobert et al., 1991; 16-Pittman Jr. et al., 2012; 17-Rehbein et al., 2011; 18-Schade and Crutzen, 1995; 19-Simmleit and Schulten, 1989; 20-Yokelson et al., 2013; 21-Veres et al., 2010

## Sheet: Table S5
Table S5. Emission ratios to NH3 for nitrogen-containing species
Assignment	m/z	Formula	African Grass K1 (flat)	African Grass S1	African Grass S2	Alfalfa Organic CO	Alfalfa Organic CO	Black Spruce AK	Chamise CA	Cook Red Oak 3Stone	Cook Red Oak Envirofit Rocket G3300	Giant Cutgrass SC	Giant Cutgrass SC (flat)	Hay Organic CO	Juniper MT	Manzanita CA	Millet Ghana	Peat Canadian	Peat Indonesian	Peat Indonesian	Peat NC JR	Ponderosa Pine MT brown/green	Rice Straw China	Rice Straw Taiwan	Sawgrass SC	Sugar Cane LA	Sugar Cane LA	Wheat Straw Conv WA	Wheat Straw Organic CO	Wiregrass SC
		Fire #	49	82	81	36	65	39	63	102	105	116	120	87	98	10	37	112	114	125	113	35	93	85	55	117	121	75	96	78
MCE			0.973361	0.977828	0.969917	0.914681	0.912323	0.959392	0.943288	0.971691	0.985176	0.958949	0.956493	0.941417	0.962949	0.933371	0.931051	0.810954	0.743893	0.871515	0.692288	0.912111	0.937956	0.94689	0.957378	0.914094	0.929336	0.96321	0.96475	0.971609
%N			0.21	0.47	0.7	2.91	2.91	0.66	1	0.09	0.09	2.03	2.03	1.99	1.17	0.73	0.08	1.22	2.5	2.03	1.26	1.09	1.3	1.09	0.93	0.76	0.76	0.69	0.4	0.61
Ammonia	18.0338	NH3	1	1	1	1	1	1	1	1	1	1	1	1	1	1	1	1	1	1	1	1	1	1	1	1	1	1	1	1
Hydrogen Cyanide	28.0182	HCN	0.950026	0.579041	0.427739	0.101732	0.112585	0.470615	0.161846	1.60043		0.277094	0.624975	0.1156	0.0831684			0.571065	1.22245	3.02325	1.4658	0.373927	0.205337	0.299385	0.695936	0.28732	0.210134	0.288372	0.590337	0.890744
Nitric oxide		NO	7.92144	7.9411	4.8657	0.137052	0.257378	3.48195	2.84018	10.3857	16.7258	1.7365	2.51608	0.422681	2.66207	0.832976	3.39619			1.1635	0.210712	1.1504	0.843259	1.35584	5.09503	0.455856	0.554933	3.82346	4.71284	14.4409
Nitrogen dioxide		NO2	5.47763	2.84165	1.93408	0.0464926	0.0740944	2.75812	0.502414	23.8149	16.4246	0.404454	0.742726	0.0960963	0.631891	0.00260252	1.04032			1.24359	0.29374	1.01016	0.515592	0.828546	1.63986	0.487005	0.462321	1.50031	4.02536	3.62452
Nitrous acid		HONO	0.751699	0.448693	0.305235	0.0260254	0.0173247	0.503626	0.220044	3.47316		0.0640557	0.15743	0.0396594	0.134593	0.412188						0.447342	0.139027	0.115591	0.250244	0.213672	0.171461	0.240165	0.453716	1.29218
Acetonitirile	42.0338	C2H3N	0.138113	0.0722878	0.0886979	0.0253951	0.0624538	0.07282	0.0397748	0.124854	0.00262101	0.12279	0.0987783	0.0812699	0.0257163		0.0370885	0.0732535	0.103402	0.464735	0.170021	0.0661256	0.091993	0.104357	0.114696	0.102557	0.0780572	0.0417507	0.123763	0.0758898
Dimethylamine; Ethylamine	46.0651	C2H7N		0.0318677	0.0319904	0.00635061	0.00879248	0.0083044	0.0125681	0.220929	0.0232953		0.000928328	0.026514	0.0037601	0.00433163	0.0339589					0.0338791	0.0219607	0.0219925		0.0512675	0.00852269	0.0140542	0.0855184
Acetamide	60.0444	C2H5NO								0.13654								0.486478	0.615677	0.364215	0.474534		0.0224599
Trimethylamine	60.0808	C3H9N	0.0511905	0.00356259	0.010713	0.00132445	0.00193646	0.00405298	0.00118736			0.00916485	0.000497306	0.0315548	0.000194627	0.00125974	0.0028386					0.00373562	0.00245855	0.0211108	0.0125932	0.0413223	0.00355957	0.0039174	0.0558734	0.0260009
Assorted Amides	88.0757	C4H9NO	0.0321807	0.0149863	0.0173744	0.00153048	0.00408889		0.00379798	0.19066	0.0655598	0.00332102		0.0072431	0.00129913		0.017321	0.00108124	0.000298689	0.0381741	0.000268137	0.0161565	0.00357489	0.0107652	0.003243	0.0316125		0.00590594	0.0529441	0.020876
Assorted Amines	90.0913	C4H11NO		0.00317642	0.0042789																		0.00491638	0.00248785		0.0089883			0.0124422
Benzonitrile	104.049	C7H5N						0.0111539					0.00134045			0.00658001											0.0172596
NH3 as fuel N (%)			3.04605	2.10569	2.77941	25.8467	14.6565	4.26798	4.47282	2.0958	2.01381	4.59754	1.85615	11.8026	5.14197	9.66316	14.701	15.4481	6.4936	2.78418	10.1094	5.81021	6.49383	6.08473	2.02671	12.2226	12.5521	2.45656	2.88717	1.03594
TOF N-species as fuel-N (%)			0.674652	0.265066	0.425402	0.894313	1.13253	0.41114	0.256419	1.41044	0.184215	0.621935	0.188482	1.73005	0.159248	0.117614	1.34084	8.66352	4.67135	2.41423	6.51877	0.696626	0.956953	0.977896	0.26455	2.88145	1.34808	0.16122	0.954329	0.127179
